1 **Leptin antagonism improves Rett syndrome phenotype in symptomatic male *Mecp2-null***  
2 **mice.**

3 Yasmine Belaïdouni<sup>1</sup>, Diabe Diabira<sup>1</sup>, Mélanie Brosset-Heckel<sup>1</sup>, Victoria Valsamides<sup>1</sup>, Jean-  
4 Charles Graziano<sup>1#</sup>, Catarina Santos<sup>3</sup>, Clément Menuet<sup>1</sup>, Gary A. Wayman<sup>2</sup> and Jean-Luc  
5 Gaiarsa<sup>1\*</sup>.

6 <sup>1</sup>INMED, INSERM, Aix Marseille Univ, France.

7 <sup>2</sup>Program in Neuroscience, Department of Integrative Physiology and Neuroscience, Washington  
8 State University, Pullman, WA, United States.

9 <sup>3</sup>Phenotype Expertise, Marseille, France.

10 \*Correspondence to: [jean-luc.gaiarsa@inserm.fr](mailto:jean-luc.gaiarsa@inserm.fr)

11 #present address: Aix-Marseille Univ, Institut Paoli Calmettes, INSERM, CNRS, CRCM,  
12 Marseille, France.

13 **Running head:** Rett syndrome and leptin.

14 **Key words:** leptin, breathing, Rett syndrome, hippocampus, E/I balance, *Mecp2*.

15

## 16 **ABSTRACT**

17 Rett syndrome (RTT) is a severe neurodevelopmental disorder that arise from *de novo* mutations  
18 in the X-linked gene *MECP2* (methyl-CpG-binding protein 2). Circulating levels of the adipocyte  
19 hormone leptin are elevated in RTT patients and rodent models of the disease. Leptin targets a  
20 large number of brain structures and regulates a wide range of developmental and physiological  
21 functions which are altered in RTT. We hypothesized that elevated leptin levels might contribute  
22 to RTT pathogenesis. Accordingly, we show that pharmacological antagonism of leptin or  
23 genetic reduction of leptin production prevents the degradation of health status, weight loss and  
24 the progression of breathing and locomotor deficits. At the neuronal level, the anti-leptin  
25 strategies rescue the hippocampal excitatory/inhibitory imbalance and synaptic plasticity  
26 impairment. Targeting leptin might therefore represent a new approach for RTT treatment.

27

## 28 **INTRODUCTION**

29 Rett syndrome (RTT; OMIM identifier #312750) is a rare non-inherited genetic  
30 neurodevelopmental disorder characterized by severe impairments affecting nearly every aspect  
31 of child's life. After an apparently normal development until about 6–18 months of age, RTT  
32 patients undergo a period of rapid regression including, but not limited to, loss of purposeful hand  
33 movements, loss of acquired speech, breathing irregularities, seizures, and severe cognitive  
34 deficits (Sandweiss et al., 2020). Typical RTT cases arise from *de novo* mutations in the X-linked  
35 gene *MECP2* (methyl-CpG-binding protein 2). The MECP2 protein binds to methylated DNA to  
36 modulate the expression of thousands of genes (Lewis et al., 1992) and plays an important role in  
37 brain development and functioning throughout the lifespan (Cheval et al., 2012) .

38           Several clinical features of the human disorder are recapitulated in *Mecp2*-deficient mice  
39 (Ricceri et al., 2008). These mouse models therefore represent an essential tool for deciphering  
40 the cellular mechanisms of the disease and for testing potential therapeutic treatments. The  
41 demonstration that phenotypic rescue is possible in *Mecp2*-deficient mice upon re-expressing  
42 *Mecp2* gene in adult mice (Guy et al., 2007) has indicated that RTT is not an irrevocable disease,  
43 giving hope for therapeutic interventions.

44           Many aspects of neurochemistry are altered in RTT, including the levels of neurotrophic  
45 factors and neuromodulators, some of which holding therapeutic promises (Ehinger et al., 2018).  
46 Among these deregulated factors, epidemiological and animals studies showed that the  
47 circulating levels of leptin are elevated in RTT patients and rodent models of the disease (Bardi  
48 et al., 2007, 2009; Acampa et al., 2008; Park et al., 2014; Fukuhara et al., 2019). Leptin, the  
49 product of the obese (*ob*) gene, is a circulating hormone secreted mainly from the white  
50 adipocytes and transported across the blood brain barrier to the hypothalamus, to suppress food  
51 intake (Ahima and Flier, 2000). It is increasingly clear that the hypothalamus is not the only site  
52 of leptin action, and that food intake is not its only biological role. Leptin is a pleiotropic  
53 hormone that modulates motivation (Davis et al., 2010), cognitive functions (Harvey, 2022),  
54 anxiety (Guo et al., 2012), the excitability of neuronal networks (Shanley et al., 2002),  
55 epileptiform activities (Mora-Muñoz et al., 2018), breathing activity (Gauda et al., 2020), and  
56 more (Signore et al., 2008; Lim et al., 2009; Li et al., 2018). Large bodies of evidence also  
57 indicate that leptin acts as an important neurotrophic factor during perinatal periods promoting  
58 neuritic growth and synaptogenesis in a variety of brain structures including the hypothalamus  
59 (Bouret et al., 2004; Pinto et al., 2004) and hippocampus (O'Malley et al., 2007; Moulton and  
60 Harvey, 2008; Dhar et al., 2014; Dumon et al., 2018; Sahin et al., 2020, 2021). Due to these

61 important physiological and developmental functions, dysregulation – either excess or deficiency  
62 – in leptin availability or signaling can have far reaching effects. Accordingly, animal studies  
63 showed that abnormal leptin levels at any time of lifespan can lead to adverse outcomes including  
64 social and cognitive impairments, altered breathing activity, seizures susceptibility and abnormal  
65 brain development (Harvey, 2003; Greco et al., 2010; Dumon et al., 2018; Mora-Muñoz et al.,  
66 2018; Gauda et al., 2020). Thus, excess levels of leptin in RTT patients (Blardi et al., 2007, 2009;  
67 Acampa et al., 2008) might contribute to the disorders associated with Rett syndrome.

68 To address this hypothesis, we confirmed an excess of serum leptin in male *Mecp2<sup>tm1-1Bird</sup>*  
69 mice (hereafter referred to as *Mecp2<sup>-y</sup>* mice) and assessed the effects of “anti-leptin” strategies in  
70 ameliorating deficits typically displayed by this RTT mouse model. We show that  
71 pharmacological antagonism of leptin or genetic reduction of leptin production prevents the  
72 degradation of health status, weight loss as well as the progression of breathing and locomotor  
73 deficits in male *Mecp2<sup>-y</sup>* mice and, at the neuronal level, rescues the hippocampal  
74 excitatory/inhibitory imbalance and synaptic plasticity impairment.

75

76 **RESULTS**

77 **Serum leptin levels and leptin mRNA expressions are altered in *Mecp2*<sup>-y</sup> mice.**

78 The aim of this study was to assess the contribution of leptin in RTT. Therefore, as a prerequisite  
79 for this study, we evaluated the circulating levels of leptin by ELISA, and the *Lep* mRNA  
80 expression from two main sources of leptin, the white adipose tissues (WAT) and gastrocnemius  
81 muscle, by qRT-PCR in male *Mecp2*<sup>-y</sup> and WT littermates. We found that *Mecp2*<sup>-y</sup> mice  
82 exhibited elevated circulating leptin levels compared to WT littermates, and that this difference  
83 reach significance at postnatal day (P) 30 and 50 (p=0.045 and 0.0002 respectively, Two-tailed  
84 unpaired *t*-test, **Figure 1A, supplementary table 1**). Interestingly, the elevated level of leptin in  
85 *Mecp2*<sup>-y</sup> mice was observed despite their decrease in body weight (19.8±0.6 vs 13.6±0.5g,  
86 p<0.0001, two-tailed unpaired *t*-test, **Figures 1B**). *Mecp2*<sup>-y</sup> mice also exhibited higher expression  
87 of leptin mRNA in gastrocnemius muscle (**Figure 1C**), as well as in visceral and inguinal WAT  
88 (**Figures 1D and E**) compared to their WT littermates. The difference reaches significance at P30  
89 in inguinal WAT (p=0.03, Two-tailed unpaired *t*-test, **supplementary table 1**) and at P50 in  
90 gastrocnemius muscle (p=0.0015), visceral WAT (p=0.03) and inguinal WAT (p=0.03, Two-  
91 tailed unpaired *t*-test, **supplementary table 1**). Altogether, these data show that circulating leptin  
92 levels and leptin mRNA expression are elevated in male *Mecp2*<sup>-y</sup> mice compared to their age-  
93 matched WT littermates, providing a framework to assess the role of leptin in RTT-associated  
94 symptoms.

95  
96 **Leptin antagonism during the symptomatic stage prevents the progression of breathing**  
97 **deficits in *Mecp2*<sup>-y</sup> mice.**

98 Respiratory disorders have been well described in patients and rodent models of RTT (Ramirez et  
99 al., 2013). Leptin has been reported to regulate breathing acting on brainstem respiratory  
100 networks and carotid body (Gauda et al., 2020). We therefore investigate the possible  
101 contribution of leptin to RTT-associated breathing disorders. We first characterized the  
102 respiratory activity of *Mecp2*<sup>-y</sup> mice from our breeding colony. Consistent with previous studies  
103 (Katz et al., 2009), when compared with their age-matched WT littermates, P40 *Mecp2*<sup>-y</sup> mice  
104 developed respiratory disorders characterized by increased number of apneas ( $p < 0.0001$ , Two-  
105 tailed unpaired *t*-test, **Figure 2A, supplementary table 2**), cycle duration variability expressed as  
106 breathing irregularity score ( $14.6 \pm 0.7$  vs  $21.5 \pm 0.8$ , 28 and 29 mice,  $p < 0.0001$ , Two-tailed  
107 unpaired *t*-test, **data not shown**), and minute ventilation ( $5.5 \pm 0.4$  vs  $9.4 \pm 0.7$  ml g<sup>-1</sup> min<sup>-1</sup>, 28 and  
108 29 mice,  $p < 0.0001$ , Two-tailed unpaired *t*-test, **data not shown**). These breathing distresses  
109 worsen with age in *Mecp2*<sup>-y</sup> mice, while the respiratory parameters remained constant in WT  
110 (**Figures 2B and C, supplementary table 2**). Next, to test the possible role of leptin in RTT-  
111 associated breathing disorders, P40 WT and *Mecp2*<sup>-y</sup> mice received daily sub-cutaneous injection  
112 of leptin recombinant (5μg/g) or every other day sub-cutaneous injection of a pegylated leptin  
113 antagonist (5μg/g) (Gertler and Elinav, 2014), during 10 days. Sham mice received the same  
114 volume of vehicle. We used plethysmography to record breathing activity of each mouse at P40,  
115 the day before the start of treatment, and at P50, the last day of treatment. Leptin treatment of WT  
116 mice led to a significant increase in the number of apneas ( $p = 0.017$  when compared to P40, Two-  
117 tailed paired *t*-test, **Figure 2B**,  $p = 0.012$  when compared to P50 sham WT mice, Two-tailed  
118 unpaired *t*-test, **Figure 2D, supplementary table 2**) and breathing irregularity score ( $p = 0.04$   
119 when compared to P50 sham WT mice, Two-tailed unpaired *t*-test, **Figures 2E, supplementary**  
120 **table 2**), while in sham WT mice these parameters remained unchanged (**Figures 2B, D and E,**  
121 **supplementary table 2**). The mean values of tidal volume (**data not shown**), respiratory

122 frequency (**data not shown**) and minute ventilation ( $p=0.72$  when compared to P50 treated WT  
123 mice, Two-tailed unpaired *t*-test, **Figure 2F, supplementary table 2**) were not affected by the  
124 leptin-treatment.

125 We next investigated the effect of anti-leptin treatment ( $5\mu\text{g/g}$ , every other day during 10 days)  
126 on the breathing activity of the *Mecp2*<sup>-y</sup> mice. While the sham and anti-leptin treated *Mecp2*<sup>-y</sup>  
127 mice show similar phenotypic profile at the beginning of the treatment ( $p=0.43$ , Two-tailed  
128 unpaired *t*-test, **Figure 2C**), anti-leptin treated *Mecp2*<sup>-y</sup> mice show better breathing parameters  
129 (number of apneas and breathing irregularity score) compared to sham *Mecp2*<sup>-y</sup> mice at the end  
130 of the treatment ( $p=0.015$  and  $0.0015$ , Two-way ANOVA followed by a Bonferroni's multiple  
131 comparison, **Figures 2C, D and E, supplementary table 2**). The mean values of tidal volume  
132 (**data not shown**), respiratory frequency (**data not shown**) and minute ventilation ( $p>0.999$ ,  
133 Two-way ANOVA followed by a Bonferroni's multiple comparison, **Figure 2F, supplementary**  
134 **table 5**) of P50 *Mecp2*<sup>-y</sup> mice were not affected by the anti-leptin-treatment. We also tested the  
135 effect of leptin treatment and found no effect on the breathing parameters in *Mecp2*<sup>-y</sup> mice  
136 (**Figures 2D, E and F, supplementary table 2**).

137 Altogether, these data suggest a contribution of leptin to the progression of breathing difficulties  
138 in symptomatic *Mecp2*<sup>-y</sup> mice.

139  
140 **Leptin antagonism during the symptomatic stage prevents the worsening of health**  
141 **condition of *Mecp2*<sup>-y</sup> mice.**

142 We next assessed the efficacy of the anti-leptin treatment on the overall health of the *Mecp2*<sup>-y</sup>  
143 mice. The thoroughly described loss in body weight in *Mecp2*<sup>-y</sup> mice ( $p=0.00001$ , Two-tailed  
144 unpaired *t*-test **Figures 3A and B, supplementary table 3**) was abolished by the anti-leptin

145 treatment (5µg/g, every other day during 10 days, from P40 to P50) while the leptin-treated  
146 *Mecp2*<sup>-y</sup> mice (5µg/g, 10 daily injections from P40 to P50) showed no difference compared to  
147 sham *Mecp2*<sup>-y</sup> littermates (p=0.0001 and 0.59 respectively at P50, Two-way ANOVA followed  
148 by a Bonferroni's multiple comparison, **Figures 3B and C, supplementary table 3**). The leptin  
149 treatment also did not induce significant change in the body weight of the WT mice (p=0.06 at  
150 P50, Two-tailed unpaired *t*-test, **Figures 3C, supplementary table 3**). We also performed a  
151 general scoring of the health condition of the mice, including tremor, general aspect, spontaneous  
152 activity, limb grasp and posture. WT and *Mecp2*<sup>-y</sup> mice showed significant difference at P40  
153 (p=0.000001, two-tailed unpaired *t*-test, **Figure 3D, supplementary table 3**). The general health  
154 scoring performed on sham- and anti-leptin treated *Mecp2*<sup>-y</sup> mice the day before the start of  
155 treatment (P40) and the last day of treatment (P50) revealed a deterioration of the health  
156 condition in sham *Mecp2*<sup>-y</sup> mice that was not observed in anti-leptin treated *Mecp2*<sup>-y</sup> mice  
157 (p=0.03 and 0.16, two-tailed paired *t*-test, **Figure 3E, supplementary table 3**). Improved  
158 symptoms are posture, tremor and general aspect while spontaneous activity and limb grasp  
159 showed no significant improvement (**Figure 3F, supplementary table 3**). Although it does not  
160 reach significance, this improvement in overall health of the anti-leptin treated *Mecp2*<sup>-y</sup> mice was  
161 accompanied by a decrease of early lethality, with 50% of the sham- and anti-leptin treated  
162 *Mecp2*<sup>-y</sup> mice surviving after the postnatal day 48.5 and 59 respectively (p=0.1, two-tailed  
163 unpaired *t*-test, p=0.16, Kaplan- Meier log rank test, **Figure 3G**). No lethality nor change in the  
164 health scoring were observed in WT mice treated with either vehicle or leptin (n=10 for both,  
165 data not shown).

166



167 We also assess the effect of the anti-leptin treatment on the locomotor activity and motor  
168 coordination of *Mecp2*<sup>-y</sup> mice in the open field and the accelerating rotarod tests. In the open  
169 field test, the distance traveled by the *Mecp2*<sup>-y</sup> mice was reduced compare to their WT littermates  
170 (p=0.016, Two-tailed unpaired *t*-test **Figures 4A, supplementary table 7**). This locomotor  
171 deficit worsens with age in *Mecp2*<sup>-y</sup> mice (p=0.03, P40 vs P50 *Mecp2*<sup>-y</sup> sham, Two-tailed paired  
172 *t*-test, **Figures 4B, supplementary table 4**). The anti-leptin treatment (5μg/g, every other day  
173 during 10 days, from P40 to P50) prevented the degradation of locomotor activity of the *Mecp2*<sup>-y</sup>  
174 mice (p=0.66, P40 vs P50 *Mecp2*<sup>-y</sup> anti-leptin, Two-tailed paired *t*-test and p=0.04, P50 *Mecp2*<sup>-y</sup>  
175 sham vs P50 *Mecp2*<sup>-y</sup> anti-leptin, Two-tailed unpaired *t*-test, **Figures 4B and C, supplementary**  
176 **table 4**). Analysis of the behavior of the leptin-treated WT mice indicates that they performed  
177 similarly to their sham littermates (p=0.4, Two-tailed unpaired *t*-test **Figure 4C, supplementary**  
178 **table 4**). In the accelerating rotarod test, *Mecp2*<sup>-y</sup> mice showed a significant decrease in the  
179 latency to fall compared to WT littermates (p<0.0001, Mann Whitney *U* test, **Figure 4D,**  
180 **supplementary table 7**). This phenotype did not worsen with age (p=0.29, P40 vs P50 *Mecp2*<sup>-y</sup>  
181 sham, Wilcoxon matched pairs signed rank test, **Figures 4E, supplementary table 4**). Neither  
182 the leptin- nor the anti-leptin treatment affected the performances of respectively WT and *Mecp2*<sup>-y</sup>  
183 mice on the accelerating rotarod test (p=0.18 and 0.42 respectively, two-tailed unpaired *t*-test,  
184 **Figure 4F, supplementary table 4**).

185 Overall, these observations show that the anti-leptin treatment ameliorates the overall health  
186 condition, i.e., posture, tremor and general aspect and locomotor activity of the symptomatic  
187 *Mecp2*<sup>-y</sup> mice.

188

189 **Leptin antagonism during the symptomatic stage does not affect anxiety in *Mecp2*<sup>-y</sup> mice.**

190 Leptin has been reported to exert anti-depressant and pro-cognitive like effects in rodents (Guo et  
191 al., 2012; Harvey, 2022). We therefore investigate the possible contribution of leptin to cognitive  
192 behavioral deficits repeatedly reported in RTT models (Kerr et al., 2010). Our first set of  
193 behavioral tests examined anxiety, cognition and social interaction in P50 WT and *Mecp2*<sup>-/-</sup> mice  
194 from our breeding colony. We first compared the spontaneous exploration in the elevated plus  
195 maze (EPM) as a measure of anxiety and found that *Mecp2*<sup>-/-</sup> mice spent more time in the open  
196 arms than their WT littermate (p<0.0001, Two-way ANOVA followed by a Bonferroni's multiple  
197 comparison, **Figure 4G, supplementary table 4**). The mean dipping time was also increased in  
198 *Mecp2*<sup>-/-</sup> mice (p=0.086, Two-way ANOVA followed by a Bonferroni's multiple comparison,  
199 **Figure 4H, supplementary table 4**) a behavior also consistent with decreased anxiety. However,  
200 no genotype effects were found in tests used to evaluate object recognition and social behavior  
201 (**supplementary Figure S1, supplementary table S1**). We therefore limited the study of the role  
202 of leptin to the EPM. Analysis of the behavior of the leptin-treated WT and anti-leptin treated-  
203 *Mecp2*<sup>-/-</sup> mice in the EPM indicates that they performed similarly to their vehicle-treated WT  
204 littermate, i.e. they stayed similar time in the open arms and exhibited similar mean dipping time  
205 (**Figures 4H and G, supplementary table 4**).

206 Overall, these observations show that the anti-leptin treatment does not improve anxiety  
207 impairment in the symptomatic *Mecp2*<sup>-/-</sup> mice.

208

### 209 **Symptomatic leptin antagonism does not improve seizures susceptibility in *Mecp2*<sup>-/-</sup> mice.**

210 Seizures are predominant features in RTT patients and abnormal cortical activities have been  
211 observed in *Mecp2*-deficient mice (Glaze, 2002; D'Cruz et al., 2010). Leptin modulates the  
212 excitability of neuronal networks and exerts both anti-convulsant and pro-convulsant effects

213 (Mora-Muñoz et al., 2018). To gain insight into the possible contribution of leptin in RTT-  
214 associated epileptic activity, we challenged P50 *Mecp2*<sup>-/-</sup> mice and their WT littermates with the  
215 volatile convulsant agent flurothyl (2,2,2-trifluoroethyl ether). Flurothyl induced severe tonic-  
216 clonic seizures with a loss of posture in both WT- and *Mecp2*<sup>-/-</sup> mice. The onset of seizures was  
217 more rapid in *Mecp2*<sup>-/-</sup> mice as compared to their WT littermates (p=0.0007, Two-tailed unpaired  
218 *t*-test, **Figure 5A, supplementary table 5**). Moreover, all *Mecp2*<sup>-/-</sup> mice died after the tonic-  
219 clonic seizures, while lethality was observed in 44% of WT mice (p=0.0029, Fisher exact test,  
220 **Figure 5C**). We next investigated the effect of daily leptin treatment (0.5µg/g during 10  
221 consecutive days) on the seizure latency in WT mice and found no significant difference in  
222 seizure latency (p=0.34, Two-tailed unpaired *t*-test, **Figure 5B, supplementary table 5**) and  
223 lethality (p>0.999, Fisher exact test, **Figure 5D**) compared to WT sham WT. Similarly, neither  
224 the leptin- nor the anti-leptin (0.5µg/g, every other day during 10 days) treatments affected  
225 flurothyl-induced seizures latency (p>0.999 for both, two-way ANOVA followed by a  
226 Bonferroni's multiple comparison) and lethality (p>0.999 for both, Fisher exact test) in *Mecp2*<sup>-/-</sup>  
227 mice (**Figures 5B and D, supplementary table 5**).

228 Altogether, these data suggest that leptin does not contribute to seizure susceptibility in  
229 symptomatic *Mecp2*<sup>-/-</sup> mice.

230

### 231 **Leptin antagonism during the symptomatic stage restores the E/I balance in CA3** 232 **hippocampal neurons in *Mecp2*<sup>-/-</sup> mice.**

233 We then assessed the potential benefits of anti-leptin treatment at the neuronal level. Alteration in  
234 the synaptic excitation/inhibition (E/I) balance is a widespread feature of neuronal networks in  
235 *Mecp2*-deficient mice (Li, 2022). Leptin has been reported to modulate the development and

236 functioning of both glutamatergic and GABAergic hippocampal synapses (Moult and Harvey,  
237 2009; Dhar et al., 2014; Guimond et al., 2014; Dumon et al., 2018; Sahin et al., 2020, 2021;  
238 Harvey, 2022), raising the possibility that elevated leptin levels might contribute to the altered E/I  
239 balance in *Mecp2<sup>-y</sup>* mice. We therefore performed whole cell patch clamp recordings of CA3  
240 pyramidal neurons performed on acute hippocampal slices obtained from WT and *Mecp2<sup>-y</sup>* mice  
241 and found that, as already reported (Calfa et al., 2015; Lozovaya et al., 2019), the E/I balance was  
242 increased at both presymptomatic ( $0.9 \pm 0.2$  vs  $4.5 \pm 0.9$  in respectively P30 WT (10 cells, 3 mice)  
243 and *Mecp2<sup>-y</sup>* (13 cells, 3 mice) mice littermates,  $p=0.014$ , Two-tailed Mann-Whitney test, **data**  
244 **not shown**) and symptomatic stages ( $p<0.0001$  at P50, Two-tailed Mann Whitney test, **Figures**  
245 **6A, B and D, supplementary table 6**). We next assed the effect of the leptin and leptin  
246 antagonism treatment on the E/I balance. The leptin treatment ( $0.5\mu\text{g/g}$  during 10 consecutive  
247 days from P40 to P50) led to a significant increase in the E/I balance in P50 WT mice, thus  
248 phenocopying the *Mecp2<sup>-y</sup>* mice ( $p=0.014$ , Two-tailed Kruskal-Wallis test followed by Dunn's  
249 post hoc comparison, **Figure 6C, supplementary table 2**). This increase in the E/I balance is  
250 mainly accounted for by a reduction of GABAergic activity ( $p=0.002$ , **Figure 6E,**  
251 **supplementary table 6**). When administered to *db* mice (mice deficient for the long-form leptin  
252 receptor, the only receptor capable of activating intracellular pathways (Ahima and Flier, 2000)),  
253 leptin had no effect on the E/I balance ( $1.57 \pm 0.3$  vs  $1.58 \pm 0.3$  for respectively *db*-sham (13 cells,  
254 2 mice) and *db*-lep (9 cells, 2 mice),  $p=0.787$ , Two-tailed Mann-Whitney test) and GABAergic  
255 activity ( $26.5 \pm 6.1$  vs  $20.6 \pm 4.1$  Hz,  $p=0.638$ , Two-tailed Mann-Whitney test, **data not shown**). In  
256 contrast to leptin treatment, the anti-leptin treatment ( $0.5\mu\text{g/g}$  every other day from P40 to P50)  
257 had no effect on the E/I balance of WT mice ( $p>0.999$  when compared to WT-sham, Two-tailed  
258 Kruskal-Wallis test followed by Dunn's post hoc comparison, **supplementary table 6**).  
259 Treatment of *Mecp2<sup>-y</sup>* mice revealed that leptin had no significant effect on the E/I balance

260 (p=>0.999, Two-tailed Kruskal-Wallis test followed by Dunn's post hoc comparison, **Figure 6C,**  
261 **supplementary table 6**). In contrast, the anti-leptin treatment restored the E/I balance in *Mecp2<sup>-y</sup>*  
262 mice (p=0.005 when compared to *Mecp2<sup>y/-</sup>*-sham, p>0.9999 when compared to WT-sham, Two-  
263 tailed Kruskal-Wallis test followed by Dunn's post hoc comparison, **Figure 6C, supplementary**  
264 **table 6**) and increased the GABAergic activity (p=0.028 when compared to *Mecp2<sup>-y</sup>*-sham,  
265 p>0.9999 when compared to WT-sham, Two-tailed Kruskal-Wallis test followed by Dunn's post  
266 hoc comparison, **Figure 6E, supplementary table 6**).

267 Altogether, these data show that the leptin-treatment increases the E/I balance in WT mice  
268 phenocopying the *Mecp2<sup>-y</sup>* mice, while the anti-leptin treatment rescues the E/I balance in  
269 *Mecp2<sup>-y</sup>* mice. These observations suggest a contribution of leptin to the hippocampal E/I  
270 imbalance in symptomatic *Mecp2<sup>-y</sup>* mice.

271  
272 **Leptin antagonism during the symptomatic stage restores the hippocampal synaptic**  
273 **plasticity in *Mecp2<sup>-y</sup>* mice.**

274 Impairments of synaptic plasticity are common features of mice RTT models (Asaka et al., 2006;  
275 Moretti et al., 2006; Lozovaya et al., 2019) and leptin has been reported to modulate the strength  
276 of glutamatergic synapses (McGregor and Harvey, 2019). These observations prompted us to  
277 examine the effect of leptin and leptin antagonist treatment on long term potentiation (LTP) at the  
278 hippocampal Schaffer collaterals-CA1 synapses of P50 WT and *Mecp2<sup>-y</sup>* mice. Field EPSPs were  
279 recorded in the stratum radiatum and evoked by stimuli of increasing strength. The slope of the  
280 input-output curves obtained from *Mecp2<sup>-y</sup>* mice were not significantly different from WT  
281 littermates showing that the basal neurotransmission at the Schaffer collateral-CA1 synapses is  
282 unaltered in symptomatic *Mecp2<sup>-y</sup>* mice (the slope of curve afferent volley amplitude vs field

283 EPSP slope was  $5.1 \pm 0.7$  vs  $5.2 \pm 0.7$  in respectively WT and *Mecp2*<sup>-y</sup> mice,  $p=0.8$ , Mann Whitney  
284 *U* test, data not shown). Next, LTP was induced by two trains of 100 Hz tetanic stimulation (1 sec  
285 duration, 20 sec interval). As already reported (Asaka et al., 2006), the magnitude of LTP was  
286 reduced in *Mecp2*<sup>-y</sup> compared to WT littermates ( $p=0.012$  at 45-50 min post-tetanus, repeated  
287 measure ANOVA, **Figure 7A, supplementary table 7**). The magnitude of potentiation in the  
288 first minutes following the tetanic stimulation was also reduced ( $p=0.08$  at 0-2 min post-tetanus,  
289 repeated measure ANOVA, **Figure 7A, supplementary table 7**). Leptin treatment of WT mice  
290 ( $5\mu\text{g/g}$  during 10 consecutive days from P40) attenuated the magnitude of late and early LTP  
291 compared to sham-treated but these differences did not reach significance ( $p=0.16$  and  $0.27$  for  
292 the early and late LTP, repeated measure ANOVA, **Figure 7B, supplementary table 7**).  
293 Conversely, the anti-leptin treatment ( $0.5\mu\text{g/g}$  every other day during 10 days from P40) restored  
294 the magnitude of early and late LTP in *Mecp2*<sup>-y</sup> mice ( $p=0.08$  and  $0.03$  respectively, repeated  
295 measure ANOVA, **Figure 7C, supplementary table 7**).

296 Altogether, these data suggest that leptin contributes to the impairment of hippocampal LTP in  
297 symptomatic *Mecp2*<sup>-y</sup> mice.

298

### 299 **RTT-associated symptoms are improved in leptin haplo insufficient mice.**

300 To further evaluate the possible contribution of leptin in RTT phenotype, we generated *Mecp2*<sup>-y</sup>  
301 mice that are haplo insufficient for leptin. For this, female *Mecp2*<sup>+/-</sup> mice were backcrossed with  
302 heterozygous leptin deficient male mice (*ob/+*). The resulting double transgenic *Mecp2*<sup>-y;ob/+</sup>  
303 mice showed normalized leptin levels at P50-60 ( $p=0.8$  compared to WT mice, Two-way  
304 ANOVA followed by a Bonferroni's multiple comparison, **Figure 8A, supplementary table 8**).  
305 We next asked whether the RTT associated deficits were ameliorated in these leptin haplo

306 insufficient mice at P50-60, an advanced symptomatic stage. Whole cell recordings performed on  
307 hippocampal slices revealed that the E/I balance and sGABA-PSCs frequency are improved in  
308 CA3 hippocampal neurons of *Mecp2*<sup>-y;ob/+</sup> mice (p=0.39 and 0.02 respectively when compared to  
309 WT mice, **Figure 8A and C, supplementary table 8**). Field recordings on hippocampal slices  
310 further revealed that the magnitude of early and late LTP at the Schaffer collateral-CA1 synapses  
311 was increased in *Mecp2*<sup>-y;ob/+</sup> mice (p=0.08 and 0.05 respectively when compared to *Mecp2*<sup>-y</sup>  
312 mice, **Figure 8D, supplementary table 8**). The *Mecp2*<sup>-y;ob/+</sup> mice also showed improved  
313 breathing activity (p=0.002 when compared to WT, **Figure 8E, supplementary table 8**) and less  
314 weight loss (p=0.05 when compared to WT, **Figure 8F, supplementary table 8**).

315 Overall, these data show that reduced leptin production improves the symptoms of *Mecp2*<sup>-y</sup> mice.

316

317

318

319 **DISCUSSION**

320 Here, we show that *Mecp2*<sup>-y</sup> mice have elevated circulating leptin levels and leptin  
321 mRNA expression compared to their age-matched WT littermates. Knowing the pleiotropic  
322 central and peripheral roles of leptin, this finding provided a framework for investigating the  
323 possible contribution of this adipocyte hormone in RTT pathogenesis. We thus tested the rescue  
324 potential of leptin antagonism approaches. We found that 10-day treatment from P40 of male  
325 *Mecp2*-null mice with a leptin antagonist prevents the worsening of several symptoms including  
326 breathing difficulty, locomotor deficit, weight loss and degradation of general health condition.  
327 At the neuronal level, the anti-leptin treatment restores the E/I balance and synaptic plasticity in  
328 the hippocampus. A further validation of our hypothesis is the benefits observed in mice haplo  
329 insufficient for leptin (*Mecp2*<sup>-y;ob/+</sup> mice). The leptin antagonism strategy was however  
330 ineffective against seizure susceptibility, anxiety and motor coordination deficit. In line with the  
331 contribution of leptin to RTT pathogenesis, we showed that leptin treatment of WT mice induces  
332 hippocampal E/I imbalance, reduces hippocampal synaptic plasticity and causes breathing  
333 abnormality, thus phenocopying some RTT symptoms.

334  
335 Previous studies found that leptin concentrations were increased in patients with Rett  
336 syndrome, but not associated with increases in weight gain or body mass index (Blardi et al.,  
337 2007, 2009; Acampa et al., 2008). Elevated leptin level could be related to chronic inflammatory  
338 state due to frequent respiratory infections (Cortelazzo et al., 2014) as well as hormonal and/or  
339 metabolic deregulations (Motil et al., 2011; Stagi et al., 2015). Medications, such as  
340 anticonvulsants, can also alter circulating leptin levels in patients (Belcastro et al., 2013).  
341 However, according to previous studies (Park et al., 2014; Fukuhara et al., 2019), we showed that



342 *Mecp2*-null mice also present elevated levels of circulating leptin, even though they did not  
343 receive any medication. This leptin elevation was observed in males in different models and  
344 genetic backgrounds as well as in female *Mecp2*<sup>+/-</sup> mice (Park et al., 2014; Torres-Andrade et al.,  
345 2014; Fukuhara et al., 2019) (present study and unpublished observations) highlighting the  
346 robustness of this finding and its possible relevance to the clinical situation. The mechanism  
347 underlying the increase in leptin protein and mRNA levels observed in *Mecp2*-deficient mice is  
348 presently unknown but likely rely on non-cell autonomous mechanisms since (i) neuron-specific  
349 *Mecp2* knockout mice (*Mecp2*<sup>tm1.1Jae</sup> KO mice) showed increased circulating leptin levels and  
350 WAT leptin mRNA expression (Park et al., 2014) and (ii) adipocyte-specific *Mecp2* knockout  
351 mice (*Mecp2*<sup>Adi</sup> KO mice) showed down regulated WAT leptin mRNA expression and similar  
352 circulating leptin levels compared to WT mice (Liu et al., 2019). An increase in WAT mass  
353 could explain the elevated leptin levels in *Mecp2*-deficient mice. Previous studies have shown  
354 that Lep mRNA expression and circulating leptin levels are increased in *Mecp2*-deficient mice  
355 (Torres-Andrade et al., 2014) and POMC neuron-specific *Mecp2* knockout mice (Wang et al.,  
356 2014) in association with an increase in body weight. Two other studies reported elevated leptin  
357 levels in *Mecp2*-deficient mice without weight change but with increased WAT mass (Park et al.,  
358 2014; Fukuhara et al., 2019). In the present study, WAT mass was not measured, but it is worth  
359 noting that the progressive increase in leptin levels and leptin mRNA expression were observed  
360 despite a decline in body weight. Adipose tissue is also present within skeletal muscle.  
361 Intramuscular adipose tissue (IMAT) accumulation is observed in pathological conditions such as  
362 muscle dystrophy, obesity and metabolic diseases (Sciorati et al., 2015). IMAT accumulation  
363 may underlie elevated leptin mRNA expression in muscle of symptomatic male *Mecp2*-null mice,  
364 which exhibit hypotrophic fibres and tissue fibrosis (Conti et al., 2015).

365

366           We have shown that pharmacological leptin antagonism and genetic reduction of leptin  
367 production ameliorate some RTT phenotype and prevent the degradation of others in  
368 symptomatic male *Mecp2*-null mice. We used a pegylated super active mouse leptin antagonist  
369 (Peg-SMLA). This antagonist poorly penetrated in the central nervous system, and inhibits leptin  
370 activity by two mechanisms: (i) by blocking the transport of circulating leptin across the blood  
371 brain barrier (BBB), thus reducing central leptin levels, and (ii) by blocking the binding of leptin  
372 to its peripheral receptors, thus reducing peripheral leptin signaling (Elinav et al., 2009).  
373 Likewise, haplo insufficiency for leptin will reduce both central and peripheral actions of leptin  
374 in *Mecp2*<sup>-y;ob/+</sup> mice. Several observations support the hypothesis that the beneficial action of  
375 leptin antagonism relies on a reduction in the central action of leptin. First, functional leptin  
376 receptors are expressed throughout the brain (Caron et al., 2010). Then, *in vitro* studies indicate  
377 that leptin directly regulates the excitability and synaptic function of neurons within different  
378 brain regions including the hippocampus (Shanley et al., 2002; Harvey et al., 2006; Solovyova et  
379 al., 2009; Dhar et al., 2014; Guimond et al., 2014; Dumon et al., 2018; Sahin et al., 2021) and  
380 nucleus tractus solitarii, a crucial site for the modulation of breathing, cardiovascular control and  
381 food intake (Williams and Smith, 2006; Neyens et al., 2020; Yu et al., 2022). Lastly, *in vivo*  
382 experiments show that local/systemic injections of leptin, as well as chemogenetic/optogenetic  
383 activation of leptin receptor expressing neurons, modulate physiological and behavioral  
384 responses, and that targeted deletion of central leptin receptors prevent these effects (Oomura et  
385 al., 2006; Inyushkin et al., 2009; Vong et al., 2011; Guo et al., 2013; Zuure et al., 2013; Bassi et  
386 al., 2014, 2015; Yu et al., 2022). The respiratory network is complex and the effects of leptin on  
387 respiratory control are still poorly understood. However, alterations in the E/I balance have been

388 reported in respiratory nuclei that express leptin receptor such as the nucleus tractus solitarius and  
389 the rostro ventrolateral medulla (Medrihan et al., 2008; Chen et al., 2018). The latter could  
390 contribute to apneustic and irregular breathing in *Mecp2*-deficient mice (Ramirez et al., 2013).  
391 Additional work is required to determine whether and how leptin antagonisms affect the E/I  
392 balance in these brain regions, but also in cortical areas where the E/I balance is reduced (Li,  
393 2022). Finally, we cannot completely rule out a peripheral effect of treatments in addition to the  
394 central effect, acting for example on carotid bodies.

395  
396         Knowing the facilitatory role of leptin on breathing and synaptic function, the present  
397 finding might seem counter-intuitive. It is however worth noting that an excess of leptin can lead  
398 to a blunted response to leptin, a condition known as “leptin resistance”. Thus, rodents fed with a  
399 high-fat diet that causes elevated leptin levels and leptin resistance also show altered  
400 hippocampal synaptic function, breathing difficulties and changes in anxiety level (Grillo et al.,  
401 2011; Valladolid-Acebes et al., 2012; Farr et al., 2015; Gauda et al., 2020). It cannot be totally  
402 excluded that the anti-leptin treatment or the haplo insufficiency for leptin, by decreasing the  
403 central levels of leptin, reduces the phenomenon of resistance and allows leptin to exert its  
404 beneficial effects. Similarly, leptin treatment of WT mice could lead to leptin resistance, which  
405 would be responsible for the symptoms observed in these mice. Elevated leptin levels have also  
406 been observed in children with autism spectrum disorders (Ashwood et al., 2008; Blardi et al.,  
407 2010; Raghavan et al., 2018). Yet, the clinical features seen in ASD do not completely overlap  
408 those broader of Rett syndrome, suggesting that the functional and physiological actions of leptin  
409 may depend, among other things, on the mutations associated with the etiology of the disease, in  
410 the present situation of the *Mecp2* mutations.

411           The success of most genetic and pharmacological therapeutic approaches relies on the  
412 ability of the virus or drugs to cross the BBB. To overcome this difficulty, we have used a  
413 competitive antagonist of leptin whose main action is to block the transport of leptin across the  
414 BBB (Elinav et al., 2009). We have shown that the treatment is well tolerated (no premature  
415 death during the treatment, no overt side effect) holding potential therapeutic application.  
416 Moreover leptin antagonist therapy has been reported to be efficient for the prevention or  
417 treatment of diseases in which high leptin levels is part of the picture (Singh et al., 2013; Fisch et  
418 al., 2020). It is noteworthy that leptin antagonist treatment also improves bone mineralization  
419 (Chapnik et al., 2013) and muscle function (Gonzalez et al., 2021), two peripheral symptoms  
420 observed in RTT. Furthermore, hyperleptinemia has been proposed to play a role in sympathetic  
421 over activity and cardiac abnormalities observed in RTT (Acampa et al., 2008). Overall, these  
422 observations suggest that leptin might participate to RTT clinical manifestations other than  
423 central synaptic activity, breathing and weight loss, highlighting the global therapeutic interest of  
424 this approach.

425  
426           Given the progressive nature of Rett symptoms and the high inter-individual variability,  
427 we assessed their evolution (i.e., the difference between the values at the beginning and at the end  
428 of treatment) to estimate the potential efficacy of the leptin antagonist treatment. Our data show  
429 that treatment with the leptin antagonist in the symptomatic period delays the progression of  
430 certain symptoms (i.e. breathing, locomotor activity, weight loss, general health status) rather  
431 than curing them. The performance to rotarod, which does not show any degradation in the  
432 studied period, was not modified. The notion of a "pre-symptomatic" period in RTT has recently  
433 been questioned by studies showing subtle symptoms in RTT girls and early alterations in animal

434 models before the appearance of overt symptoms (Cosentino et al., 2019). Therefore, even if  
435 translational applications would be difficult, it will be interesting in the future to determine  
436 whether pre-symptomatic treatments have greater positive effects.

437

## 438 **MATERIALS and METHODS**

439

### 440 **Animals**

441 All animal procedures were carried out in accordance with the European Union Directive of 22  
442 September (2010/63/EU) and have been approved by the Ethical Committee for Animal  
443 Experimentation (APAFIS-Number 17605-2018-1119-1115-7094) delivered by the French  
444 Ministry of Education and Research.

445 Experiments were performed on male wild type and *Mecp2<sup>2tm1-1Bird</sup>* mice (Guy et al., 2001)  
446 C57BL/6 genetic background (Jackson Laboratory, stock number 003890). Hemizygous mutant  
447 males (hereafter referred as to *Mecp2<sup>-y</sup>* mice) were generated by crossing heterozygous females  
448 (*Mecp2<sup>+/-</sup>*) with C57BL/6 wild type males. *Mecp2<sup>-y</sup>* mice haplo insufficient for leptin (hereafter  
449 referred as to *Mecp2<sup>-y:ob/+</sup>*) were generated by crossing heterozygous females *Mecp2<sup>+/-</sup>* with  
450 C57BL/6 heterozygous leptin deficient males mice (Jackson Laboratory genotyping protocol,  
451 strains B6.Cg-Lepob/J, ID 000632). Animals were housed in a temperature-controlled  
452 environment with a 12h light/dark cycle and free access to food and water. Genotyping was  
453 performed by PCR techniques according to Jackson Laboratory protocols.

454

### 455 **Leptin and anti-leptin injection**

456 Recombinant murine leptin (Peprotech, New Jersey, USA) was reconstituted in sterile water and  
457 daily injected (5 µg/g) sub-cutaneous at 12-14 hr a.m during 10 days starting at postnatal (P) 40.  
458 The pegylated super active mouse leptin antagonist (Peg-SMLA, Protein Laboratories, Rehovot,  
459 Israel) was reconstituted in sterile water (Elinav et al., 2009; Gertler and Elinav, 2014). As the

460 half-life of the Peg-SMLA was about 24 hours, mice were injected (5 µg/g) sub-cutaneous at 12-  
461 14 hr a.m every other day during 10 days starting at P40. Control mice received same volume  
462 injections of vehicle.

463

#### 464 **Leptin immunoassay**

465 Blood samples were centrifuged (10.000 rpm, 10 min, 4°C) immediately after collection at 10–11  
466 hr a.m. Quantification of endogenous leptin was performed with Mouse Leptin ELISA Kit  
467 (BioVendor R&D<sup>R</sup>, Brno, Czech Republic) following the manufacturer's protocol. The measured  
468 concentration of samples was calculated from the standard curve and expressed as ng/ml.

469

#### 470 **Real-time reverse transcription quantitative polymerase chain reaction**

471 Visceral and inguinal fat pads and gastrocnemius muscles were dissected, rapidly frozen in liquid  
472 nitrogen and stored at -80°C. Total RNAs from fat pads and gastrocnemius muscle were isolated  
473 using a RNeasy Mini kit (74106, Qiagen, Germany) and RNA Fibrous Tissue Mini kit (74704,  
474 Qiagen) respectively, following the manufacturer's instructions and quantified by reading the  
475 absorbance at 260 nm (NanoPhotometer, IMPLEN). RNAs were converted to cDNA using 1 µg  
476 RNA and a QuantiTect Reverse Transcription kit (Qiagen) according to manufacturer's  
477 instructions. Quantitative RT-PCR was performed with a Light Cycler 480 SYBR Green I Master  
478 (Roche Applied Science) following the manufacturer's instructions, using the following  
479 oligonucleotides (QuantiTect Primer Assays, Qiagen): Leptin (Mm\_Lep\_1\_SG QT00164360  
480 (NM\_008493)), and glyceraldehyde-3-phosphate dehydrogenase (GAPDH, QT001199633).

481 Relative mRNA values were calculated using the LC480 software and GAPDH as the  
482 housekeeping gene. PCR was performed in triplicate.

483

#### 484 **Hippocampal slice preparation and electrophysiological recordings**

485 Brains were removed and immersed into ice-cold (2° to 4°C) artificial cerebrospinal fluid  
486 (ACSF) with the following composition: 126 mM NaCl, 3.5 mM KCl, 2 mM CaCl<sub>2</sub>, 1.3 mM  
487 MgCl<sub>2</sub>, 1.2 mM NaH<sub>2</sub>PO<sub>4</sub>, 25 mM NaHCO<sub>3</sub>, and 11 mM glucose (pH 7.4) equilibrated with  
488 95% O<sub>2</sub> and 5% CO<sub>2</sub>. Hippocampal slices (350µm thick) were cut using a vibrating microtome  
489 (Leica VT1000S, Germany) in ice-cold oxygenated choline-replaced ACSF and were allowed to  
490 recover at least 90 min in ACSF at room temperature (25°C). Slices were then transferred to a  
491 submerged recording chamber perfused with oxygenated (95% O<sub>2</sub> and 5% CO<sub>2</sub>) ACSF (3  
492 ml/min) at 34°C.

493 *Whole cell recordings* were performed from CA3 pyramidal neurons in the voltage-clamp mode  
494 using an axopatch 200B amplifier (Molecular Devices LLC, San Jose, USA). To assess the  
495 excitatory/inhibitory balance, the glass recording electrodes (4-7 MΩ) were filled with a solution  
496 containing 100 mM K-gluconate, 13 mM KCl, 10 mM Hepes, 1.1 mM EGTA, 0.1 mM CaCl<sub>2</sub>, 4  
497 mM Mg-adenosine 5'-triphosphate, and 0.3 mM Na-guanosine 5'-triphosphate. The pH of the  
498 intracellular solution was adjusted to 7.2, and the osmolality was adjusted to 280 mOsmol liter<sup>-1</sup>.  
499 With this solution, GABA<sub>A</sub>-receptor mediated postsynaptic currents (GABA<sub>A</sub>-PSCs) reversed at  
500 -70 mV. GABA<sub>A</sub>-PSCs and Glut-PSCs were recorded at a holding potential of -45 and -70 mV  
501 respectively. Spontaneous synaptic currents, were recorded with Axoscope software version 8.1  
502 (Molecular Devices LLC, San Jose, USA) and analyzed offline with Mini Analysis Program  
503 version 6.0 (Synaptosoft).



504 *Field recordings* were performed in area CA1. A cut was made between CA1 and CA3. The  
505 Schaffer collaterals/commissural fibers were stimulated using a bipolar tungsten electrode (66  
506  $\mu\text{m}$ ; A-M Systems, WA, USA) placed on the surface of the stratum radiatum of CA1 (10–50  $\mu\text{s}$ ,  
507 5–15 V, 0.03 Hz). Extracellular tungsten electrodes (California Fine Wire, CA, USA) were used  
508 to record dendritic field excitatory postsynaptic potentials (fEPSP) from the stratum radiatum of  
509 the CA1 region. The signals were amplified using a DAM80 amplifier (WPI, UK), digitized with  
510 an Axon Digidata 1550B (Molecular Devices, CA, USA), recorded with Axoscope software  
511 version 8.1 (Molecular Devices, CA, USA) and analyzed offline with Mini Analysis Program  
512 version 6.0 (Synaptosoft, GA, USA) by measuring the onset (a 30–70% rising phase) slope of the  
513 fEPSP. LTP was induced by two 100 Hz trains of 100 stimuli 20 sec apart at 50% of the maximal  
514 intensity. The slope of the fEPSP was measured and expressed relative to the preconditioning  
515 baseline.

516

### 517 **Plethysmography.**

518 The breathing activity of non-anesthetized freely moving mice was recorded using a constant  
519 flow whole body plethysmograph (EMKA technologies, Paris, France) with 200ml animal  
520 chambers maintained at  $25 \pm 0.5$  °C and ventilated with air (600ml  $\text{min}^{-1}$ ). The breathing activity  
521 of pairs of WT and *Mecp2*<sup>-y</sup> mice littermates was simultaneously recorded. Mice were allowed to  
522 acclimate to the experimental room for 1 hour and to the plethysmography chamber and airflow  
523 for approximately 30 mins before breathing measurement. Breathing activity was recorded  
524 during 1 hour. A differential pressure transducer measured the changes in pressure in the body  
525 chamber resulting from the animal's respiration. Signals from the pressure transducer were stored  
526 on a personal computer and analyzed offline via the Spike 2 interface and software (Cambridge

527 Electronic Design, Cambridge, UK). Only periods of quiet breathing without body movements  
528 were analyzed, during which the number of apneas (> two respiratory cycles) per hour was  
529 quantified.

530

### 531 **Flurothyl-induced seizures**

532 To test seizure susceptibility, we used the convulsant agent flurothyl (2,2,2-trifluoroethyl ether).  
533 P50-55 male mice were placed in a transparent, ventilated but hermetically sealed, cage, into  
534 which the epileptic agent flurothyl was delivered at a rate of 25nl/min using a nano-pump  
535 (Harvard Apparatus) and homogeneously distributed using a mini-ventilator incorporated into the  
536 chamber. Behavioral responses were recorded using a video camera. The latency of tonic-clonic  
537 seizures was determined post hoc. The progressive injection of flurothyl into the cage produced a  
538 stereotypical behavioral manifestation of limbic seizure episodes that started from animal  
539 immobility, followed by intermediate stages (rigid posture, tranquility period, jiggles, and jerks)  
540 and ended by severe tonic-clonic seizures (stage 4). The injection of flurothyl was stopped ten  
541 seconds after beginning of tonic-clonic seizures and the cage was ventilated with fresh air. Some  
542 mice regain motor and exploratory activity after 10 mins. Others die during the tonic seizures.  
543 The percentage of surviving/dying mice varies according to the genotype and the treatment (see  
544 results section).

545

### 546 **General health scoring and lifespan**

547 Weight was measured every day from the beginning of the treatment. The phenotypic score was  
548 evaluated the day before treatment and the last day of treatment. Severity score, typically used in

549 RTT phenotypic assessments (Guy et al., 2001; Scaramuzza et al., 2021), was used to group  
550 animals into 4 severity classes: absence of phenotype (4) to severe phenotype (0). The parameters  
551 scored are: tremor, posture, limb grasp, spontaneous activity in the home cage and general aspect.  
552 To be noticed, mice that rapidly lost weight were euthanized for ethical reasons. The day of the  
553 sacrifice was considered as the endpoint of lifespan assessment.

554

### 555 **Accelerating rotarod**

556 A rotarod apparatus (Biological Research Apparatus, Gemonio, Italy) was used to measure the  
557 motor coordination. After a 5 mins habituation session (4 r.p.m), each mouse was given three  
558 trials with the rate of rotation increasing from 4 to 40 r.p.m. over 5 mins. The trial ended when  
559 the mouse fell from the rod or remained on the rotarod for at least 5 mins. The time spent on the  
560 rotarod was recorded by an automated unit, which stopped as the mouse fell. The mouse was  
561 placed back in its home cage for 10 mins between each trial. The latency to fall was determined  
562 as the best of the 3 trials.

563

### 564 **Behavior**

565 All the behavioral tests were performed by Phenotype Expertise, Inc. (France). For all tests,  
566 animals were first acclimated to the behavioral room for 30 minutes. WT and *Mecp2*<sup>-y</sup> mice  
567 underwent elevated plus maze, open field, three chamber test and spontaneous social interaction  
568 test at P50. WT and *Mecp2*<sup>-y</sup> treated mice underwent elevated plus maze and open field at P40,  
569 before the beginning of the treatment, and at P50, at the end of the treatment.

570

571 *Elevated-Plus Maze*. The EPM was used to assess anxiety state of animals. The device consists of  
572 a labyrinth of 4 arms 5 cm wide located 80 cm above the ground. Two opposite arms are open  
573 (without wall) while the other two arms are closed by side walls. The light intensity was adjusted  
574 to 20 Lux on the open arms. Mice were initially placed on the central platform and left free to  
575 explore the cross-shaped labyrinth for 5 minutes. Maze was cleaned and wiped with H<sub>2</sub>O and  
576 with 70% ethanol between each mouse. Animal movement was video-tracked using Ethovision  
577 software 11.5 (Noldus). Time spent in open and closed arms, the number of entries in open arms,  
578 as well as the distance covered, are directly measured by the software.

579  
580 *Open-field*. Open field was used to evaluate both the locomotor activity of the animals. Mice  
581 were individually placed in a 40 x 40 cm square arena with an indirect illumination of 60 lux.  
582 Mouse movement was video-tracked using Ethovision software 11.5 (Noldus) for 10 minutes.  
583 Total distance traveled and time in center (exclusion of a 5 cm border arena) are directly  
584 measured by the software. Grooming (time and events) and rearing were manually counted in live  
585 using manual functions of the software, by an experimented behaviorist. The open-field arena  
586 was cleaned and wiped with H<sub>2</sub>O and with 70% ethanol between each mouse.

587  
588 *Three-chamber social preference test*. The test was performed as described previously (Bertoni et  
589 al., 2021) with the following modifications to accommodate for the lower mobility of the  
590 animals. A square arena 40 x 40 cm was used, with the wired cages placed in opposite diagonal  
591 corners. The task was carried out in four trials. The three-chambers apparatus was cleaned and  
592 wiped with water and with 70% ethanol between each trial and each mouse. In the first trial  
593 (habituation), a test mouse was placed in the center of the arena and was allowed to freely

594 explore each chamber. The mouse was video-tracked for 5 min using Ethovision software. At the  
595 end of the trial, the animal was briefly removed from the arena to allow for the preparation of the  
596 following trial. In the second trial (social exploration), a 8- weeks old C57BL/6J congener mouse  
597 (S1) was placed randomly in one of the two wire cages to avoid a place preference. The second  
598 wire cage remained empty (E). Then the test mouse was placed in the center of the arena and  
599 allowed to freely explore for 10 min. A second 8-weeks old C57BL/6J congener mouse (S2) was  
600 placed in the second wire cage for the third trial (social discrimination). Thus, the tested mouse  
601 had the choice between a familiar mouse (S1) and a new stranger mouse (S2) for 10 min. At the  
602 end of the trial, the mouse was returned to home-cage for 30 min. For the fourth trial (short-term  
603 social memory), S2 was replaced by a new stranger mouse (S3), the familiar mouse (S1) staying  
604 the same. Then tested mouse was allowed to freely explore the arena for 10 min. Time spent in  
605 each chamber and time of contact with each wire cage (with a mouse or empty) were calculated  
606 using Ethovision software. The measure of the real social contact is represented by the time spent  
607 in nose-to-nose interactions with the unfamiliar or familiar mouse. This test was performed using  
608 grouped house mice of 4 months old.

609  
610 *Spontaneous social interaction test.* The tested mouse was placed into the same OF arenas that  
611 were used for the OF test and allowed to explore this empty arena for 2.5 min. Immediately  
612 following this initial stage, the mouse was again allowed to explore the OF for an additional 10  
613 min with the target (Swiss mouse) present. Mouse movement was video-tracked using Ethovision  
614 software 11.5 (Noldus) and the time spent in nose-to-nose, nose-to-body, and nose-to-genitals  
615 interactions was measured.

616

617 **Statistics**

618 Statistical analyses were conducted with GraphPad Prism (GraphPad software 5.01). Shapiro-  
619 Wilk normality test was used to determine the normality of distributions. We used a Two-tailed  
620 Mann-Whitney *U* test or Two-tailed unpaired *t*-test for comparison between two independent  
621 groups, a Wilcoxon matched pairs signed rank test or Two-tailed paired *t*-test for comparison  
622 between two matched data, a Two-tailed Kruskal-Wallis test followed by a Dunn's multiple  
623 comparison or a two-way ANOVA followed by a Bonferroni's multiple comparison for  
624 comparison between three or more independent groups, and a Fisher exact test for nominal  
625 comparison between two independent groups. The effect of tetanic stimulation of the slope of  
626 field EPSPs was analyzed using repeated measure ANOVA. The survival analysis was performed  
627 using a Kaplan-Meier log-rank test. Possible outliers within an experimental group were  
628 identified with Grubb's test and discarded from the final analysis. To ensure the consistency and  
629 reproducibility of our results, we conducted repeated trials in different acute hippocampal slices  
630 prepared from at least three different animals from three different littermates. All data are  
631 expressed as mean  $\pm$  standard error to the mean (S.E.M.). For results expressed as percent of WT  
632 (i.e. serum and mRNA leptin, Figure 1, all values (WT and *Mecp2*<sup>-/-</sup> mice) were normalized to  
633 the mean WT value. In the figures, box plots represent the 1<sup>st</sup> and 3<sup>rd</sup> quartiles; whiskers show  
634 data range; horizontal lines show the median.

635

636 **ACKNOWLEDGMENTS**

637 We thank the members of the Molecular and Cellular Biology facility and Animal facility at  
638 INMED. We thank Drs F. Muscatelli and I. Medyna for critical reading of the manuscript.

639

640 **CONFLICT OF INTEREST STATEMENT**

641 The authors declare no conflict of interest.

642

643 **DATA AVAILABILITY**

644 All datasets generated for this study are available on request to the corresponding author.

645

646 **AUTHOR CONTRIBUTIONS**

647 J-LG, YB, CM and GAW conceived the experiments and wrote the manuscript. YB, J-LG, DD,  
648 MB-H and VV performed the experiments. CS performed the behavioral analysis. J-CG bred the  
649 colony. All authors approved the final version of the manuscript.

650

651 **FUNDING**

652 This work was supported by the National Institute of Health (Grant 1R01HD092396), the  
653 Association Française du Syndrome de Rett, INSERM Transfert, Fondation Lejeune, and the  
654 Excellence Initiative of Aix-Marseille University-A\*midex, a french “Investissements d’Avenir  
655 programme”, MarMara AMX-19-IET-007.

656

657 **FIGURE LEGENDS**

658  
659 **Figure 1: Circulating leptin levels and leptin mRNA expressions are elevated in**  
660 **symptomatic *Mecp2*<sup>-y</sup> mice.**

661  
662 **A)** Box plots of serum leptin levels determined in blood samples taken at postnatal day (P) 15, 30  
663 and 50, using ELISA kit and expressed as percentage of age matched wild type (WT) mice mean.  
664 **B)** Scatter plots of serum leptin levels as a function of mice body weight of P30-P50 WT and  
665 *Mecp2*<sup>-y</sup> mice. **C)** Box plots of normalized Leptin mRNA expression in gastrocnemius muscle of  
666 P30 and P50 WT and *Mecp2*<sup>-y</sup> littermates. **D, E)** Box plots of normalized Leptin mRNA  
667 expression in the visceral (V) and inguinal (In) white adipose tissue (WAT) of P30 and P50 WT  
668 and *Mecp2*<sup>-y</sup> littermates. In this and following figures, box plots represent quartiles, whiskers  
669 show data range, lozenges represent arithmetic means. Numbers in parentheses indicate the  
670 number of mice used. \**P* < 0.05, \*\**P* < 0.01, \*\*\**P* < 0.001, two-tailed unpaired student *t*-test.

671  
672 **Figure 2: Leptin antagonism prevents the progression of breathing deficits of symptomatic**  
673 ***Mecp2*<sup>-y</sup> mice.**

674 **A)** Box plots of apnea frequency in P40 untreated WT and *Mecp2*<sup>-y</sup> mice. **B, C)** Plots of apnea  
675 frequency in untreated and treated WT (**B**) and *Mecp2*<sup>-y</sup> (**C**) mice. Lines indicate individual mice  
676 recorded the day before the treatment (P40) and at the end of the treatment (P50). Connected  
677 scores indicate mean±SEM. **D-F)** Box plots of the percentage of change of apnea frequency (**D**),  
678 breathing irregularity score (**E**) and minute ventilation (**F**) in sham- and treated- WT and *Mecp2*<sup>-y</sup>  
679 mice. Numbers in parenthesis indicate the number of mice used. \*\**P* < 0.01; \*\*\**P* < 0.001, Two-  
680 tailed paired t-test (B, C), Two-tailed unpaired t-test (D-F), and Two-way ANOVA followed by a  
681 Bonferroni's multiple comparison (D-F).

682  
683 **Figure 3: Leptin antagonism ameliorates the general health and lifespan of symptomatic**  
684 ***Mecp2*<sup>-y</sup> mice.**

685 **A)** Box plots of the body weight of P40 WT and *Mecp2*<sup>-y</sup> mice. **B)** Body weight change (% of  
686 P40) as a function of age in sham-, leptin- and anti-leptin treated *Mecp2*<sup>-y</sup> mice. The treatment  
687 started at P40 and ended at P50. **C)** Box plot of the body weight change (% of P40) at P50 in  
688 sham and treated mice at the indicated genotype and treatment. **D)** Severity score of P40 WT and  
689 *Mecp2*<sup>-y</sup> mice. mean±SEM. **E)** Plots of the severity score in sham- and anti-leptin treated *Mecp2*<sup>-y</sup>  
690 mice. Connected points indicate individual mice recorded the day before the treatment (P40)  
691 and at the end of the treatment (P50). Connected squares indicate mean±SEM. **F)** Radar plot of  
692 the symptoms scored in sham and anti-leptin treated *Mecp2*<sup>-y</sup> mice. **G)** Plot of the percentage of  
693 surviving mice as a function of age. The treatment started at P40 and was maintained until the  
694 death of the animal. Numbers in parenthesis indicate the number of mice used. \**P* < 0.05; \*\**P* <  
695 0.01; \*\*\**P* < 0.001, Two-way ANOVA followed by a Bonferroni's multiple comparison (C),  
696 two-tailed unpaired *t*-test (A, C), two-tailed paired *t*-test (D, E).

697



698 **Figure 4: Leptin antagonism prevents the worsening of locomotor deficit but does not**  
699 **improve motor coordination nor anxiety alterations of symptomatic *Mecp2*<sup>-y</sup> mice.**

700 A) Box plots of the distance traveled by P40 WT and *Mecp2*<sup>-y</sup> mice in an open field. B) Plots of  
701 distance traveled by sham and anti-leptin *Mecp2*<sup>-y</sup> mice in an open field. Connected points  
702 indicate individual mice recorded the day before the treatment (P40) and at the end of the  
703 treatment (P50). Connected squares indicate mean±SEM. C) Box plots of the distance traveled in  
704 an open field by P50 sham and treated mice at the indicated genotype and treatment. D) Mean ±  
705 SEM plots of the latency to fall (best performance of 3 trials) of P40 WT and *Mecp2*<sup>-y</sup> mice in  
706 the accelerating rotarod. E) Plots of latency to fall (best performance) by sham and anti-leptin  
707 *Mecp2*<sup>-y</sup> mice. Connected points indicate individual mice recorded the day before the treatment  
708 (P40) and at the end of the treatment (P50). Connected squares indicate mean±SEM. F) Box plots  
709 of the latency to fall (best performance) by P50 sham and treated mice at the indicated genotype  
710 and treatment. G, H) Box plots of the time spent in open arms (G) and dipping (H) by P40 WT  
711 and *Mecp2*<sup>-y</sup> mice, and P50 WT- and *Mecp2*<sup>-y</sup>-sham and treated mice in an elevated plus maze.  
712 mean±SEM. \**P* < 0.05; \*\**P* < 0.01; \*\*\**P* < 0.001, two-tailed unpaired *t*-test (A), two-tailed  
713 paired *t*-test (B), Wilcoxon matched pairs rank test (E), Mann Whitney test (D), Two-way  
714 ANOVA followed by a Bonferroni's multiple comparison (C, F, G, H).

715  
716 **Figure 5: Leptin antagonism during the symptomatic stage does not improve seizure**  
717 **susceptibility of *Mecp2*<sup>-y</sup> mice.**

718 A, B) Box plots of tonic-clonic seizures onset latency of P50 untreated (A) and treated (B) WT  
719 and *Mecp2*<sup>-y</sup> mice. C, D) Flurothyl-induced lethality of P50 untreated (C) and treated (D) WT  
720 and *Mecp2*<sup>-y</sup> mice. Numbers in parenthesis indicate the number of mice used. \*\**P*<0.05, \*\*\**P* <  
721 0.001, Two-tailed unpaired *t*-test (A, B), Fisher exact test (C).

722  
723 **Figure 6: Leptin contributes to the E/I imbalance in the hippocampus of symptomatic**  
724 ***Mecp2*<sup>-y</sup> mice.**

725  
726 A) Examples of whole-cell recordings performed on CA3 pyramidal neurons at a holding  
727 potential of -45 and -70 mV at P50. The glutamatergic synaptic currents are inwards and the  
728 GABAergic synaptic currents are outwards. B-D) Box plots of the ratio of spontaneous  
729 glutamatergic and GABAergic postsynaptic currents (B, C) and frequency of spontaneous  
730 GABAergic postsynaptic currents (D, E) recorded from P50 untreated- (B, D) and treated- (C, E)  
731 WT and *Mecp2*<sup>-y</sup> CA3 pyramidal neurons. Scale bars: 100pA, 2 sec. Numbers in parenthesis  
732 indicate the number of cells recorded and mice used. \*\**P* < 0.01; \*\*\**P* < 0.001, Two-tailed  
733 Mann-Whitney test (B, D). Two-tailed Kruskal-Wallis test followed by Dunn's post hoc  
734 comparison (C, E).

735  
736  
737 **Figure 7: Leptin contributes to hippocampal synaptic plasticity impairment of symptomatic**  
738 ***Mecp2*<sup>-y</sup> mice.**

739 LTP was recorded for 50 min following two trains of 100 Hz tetanic stimulation (1sec duration,  
740 20 sec interval) at the Schaffer collateral-CA1 synapses of acute hippocampal slices from  
741 symptomatic (P50) untreated and treated *Mecp2*<sup>-y</sup> and WT mice. Insets show examples of fEPSP.  
742 Scale bar: 100μV, 3ms. Numbers in parenthesis indicate the number of slices recorded and mice  
743 used. \**P* < 0.05, Repeated measure ANOVA.

744

745 **Figure 8: RTT-associated symptoms are improved in leptin haplo insufficient mice.**

746 **A)** Serum leptin levels in P50 WT, *Mecp2*<sup>-y</sup> and *Mecp2*<sup>-y;ob/+</sup> littermates. **B,C)** Box plots of the  
747 frequency ratio of spontaneous glutamatergic and GABAergic postsynaptic currents (B) and  
748 frequency of spontaneous GABAergic postsynaptic currents (C) recorded from CA3 pyramidal  
749 neurons at P50. **D)** LTP at the Schaffer collateral-CA1 synapses of acute hippocampal slices  
750 from symptomatic (P50-60) *Mecp2*<sup>-y</sup> and *Mecp2*<sup>-y;ob/+</sup> mice. **E,F)** Box plots of apnea frequency  
751 (E) and body weight (F) in P50 WT, *Mecp2*<sup>-y</sup> and *Mecp2*<sup>-y;ob/+</sup> littermates. Numbers in  
752 parenthesis indicate the number of mice used and number of cells recorded. \**P* < 0.05; \*\**P* <  
753 0.01; \*\*\**P* < 0.001. Two-way ANOVA followed by a Bonferroni's multiple comparison (A, D,  
754 E), two-tailed Kruskal-Wallis followed by a Dunn's multiple comparison (B,C), repeated  
755 measure ANOVA (F).

756

757

758

759

760 **REFERENCES**

- 761 Acampa, M., Guideri, F., Hayek, J., Bardi, P., De Lalla, A., Zappella, M., et al. (2008). Sympathetic  
762 overactivity and plasma leptin levels in Rett syndrome. *Neurosci. Lett.* 432, 69–72. doi:  
763 10.1016/j.neulet.2007.12.030.
- 764 Ahima, R. S., and Flier, J. S. (2000). Leptin. *Annual Review of Physiology* 62, 413–437. doi:  
765 10.1146/annurev.physiol.62.1.413.
- 766 Asaka, Y., Jugloff, D. G. M., Zhang, L., Eubanks, J. H., and Fitzsimonds, R. M. (2006). Hippocampal  
767 synaptic plasticity is impaired in the Mecp2-null mouse model of Rett syndrome. *Neurobiol Dis* 21, 217–  
768 227. doi: 10.1016/j.nbd.2005.07.005.
- 769 Ashwood, P., Kwong, C., Hansen, R., Hertz-Picciotto, I., Croen, L., Krakowiak, P., et al. (2008). Brief  
770 report: plasma leptin levels are elevated in autism: association with early onset phenotype? *J Autism Dev*  
771 *Disord* 38, 169–175. doi: 10.1007/s10803-006-0353-1.
- 772 Bassi, M., Furuya, W. I., Menani, J. V., Colombari, D. S. A., do Carmo, J. M., da Silva, A. A., et al.  
773 (2014). Leptin into the ventrolateral medulla facilitates chemorespiratory response in leptin-deficient  
774 (ob/ob) mice. *Acta Physiol (Oxf)* 211, 240–248. doi: 10.1111/apha.12257.
- 775 Bassi, M., Nakamura, N. B., Furuya, W. I., Colombari, D. S. A., Menani, J. V., do Carmo, J. M., et al.  
776 (2015). Activation of the brain melanocortin system is required for leptin-induced modulation of  
777 chemorespiratory function. *Acta Physiol (Oxf)* 213, 893–901. doi: 10.1111/apha.12394.
- 778 Belcastro, V., D'Egidio, C., Striano, P., and Verrotti, A. (2013). Metabolic and endocrine effects of  
779 valproic acid chronic treatment. *Epilepsy Res* 107, 1–8. doi: 10.1016/j.eplepsyres.2013.08.016.
- 780 Bertoni, A., Schaller, F., Tyzio, R., Gaillard, S., Santini, F., Xolin, M., et al. (2021). Oxytocin  
781 administration in neonates shapes hippocampal circuitry and restores social behavior in a mouse model of  
782 autism. *Mol Psychiatry*. doi: 10.1038/s41380-021-01227-6.
- 783 Bardi, P., de Lalla, A., Ceccatelli, L., Vanessa, G., Auteri, A., and Hayek, J. (2010). Variations of plasma  
784 leptin and adiponectin levels in autistic patients. *Neurosci. Lett.* 479, 54–57. doi:  
785 10.1016/j.neulet.2010.05.027.
- 786 Bardi, P., de Lalla, A., D'Ambrogio, T., Vonella, G., Ceccatelli, L., Auteri, A., et al. (2009). Long-term  
787 plasma levels of leptin and adiponectin in Rett syndrome. *Clin. Endocrinol. (Oxf)* 70, 706–709. doi:  
788 10.1111/j.1365-2265.2008.03386.x.
- 789 Bardi, P., de Lalla, A., D'Ambrogio, T., Zappella, M., Cevenini, G., Ceccatelli, L., et al. (2007). Rett  
790 syndrome and plasma leptin levels. *J Pediatr* 150, 37–39. doi: 10.1016/j.jpeds.2006.10.061.
- 791 Bouret, S. G., Draper, S. J., and Simerly, R. B. (2004). Trophic action of leptin on hypothalamic neurons  
792 that regulate feeding. *Science* 304, 108–110. doi: 10.1126/science.1095004.
- 793 Calfa, G., Li, W., Rutherford, J. M., and Pozzo-Miller, L. (2015). Excitation/inhibition imbalance and  
794 impaired synaptic inhibition in hippocampal area CA3 of Mecp2 knockout mice. *Hippocampus* 25, 159–  
795 168. doi: 10.1002/hipo.22360.

- 796 Caron, E., Sachot, C., Prevot, V., and Bouret, S. G. (2010). Distribution of leptin-sensitive cells in the  
797 postnatal and adult mouse brain. *J. Comp. Neurol.* 518, 459–476. doi: 10.1002/cne.22219.
- 798 Chahrour, M., and Zoghbi, H. Y. (2007). The story of Rett syndrome: from clinic to neurobiology. *Neuron*  
799 56, 422–437. doi: 10.1016/j.neuron.2007.10.001.
- 800 Chapnik, N., Solomon, G., Genzer, Y., Miskin, R., Gertler, A., and Froy, O. (2013). A superactive leptin  
801 antagonist alters metabolism and locomotion in high-leptin mice. *J Endocrinol* 217, 283–290. doi:  
802 10.1530/JOE-13-0033.
- 803 Chen, C.-Y., Di Lucente, J., Lin, Y.-C., Lien, C.-C., Rogawski, M. A., Maezawa, I., et al. (2018).  
804 Defective GABAergic neurotransmission in the nucleus tractus solitarius in Mecp2-null mice, a model of  
805 Rett syndrome. *Neurobiol Dis* 109, 25–32. doi: 10.1016/j.nbd.2017.09.006.
- 806 Cheval, H., Guy, J., Merusi, C., De Sousa, D., Selfridge, J., and Bird, A. (2012). Postnatal inactivation  
807 reveals enhanced requirement for MeCP2 at distinct age windows. *Hum Mol Genet* 21, 3806–3814. doi:  
808 10.1093/hmg/dd208.
- 809 Conti, V., Gandaglia, A., Galli, F., Tirone, M., Bellini, E., Campana, L., et al. (2015). MeCP2 Affects  
810 Skeletal Muscle Growth and Morphology through Non Cell-Autonomous Mechanisms. *PLoS One* 10,  
811 e0130183. doi: 10.1371/journal.pone.0130183.
- 812 Cortelazzo, A., De Felice, C., Guerranti, R., Signorini, C., Leoncini, S., Pecorelli, A., et al. (2014).  
813 Subclinical inflammatory status in Rett syndrome. *Mediators Inflamm* 2014, 480980. doi:  
814 10.1155/2014/480980.
- 815 Davis, J. F., Choi, D. L., and Benoit, S. C. (2010). Insulin, leptin and reward. *Trends Endocrinol Metab*  
816 21, 68–74. doi: 10.1016/j.tem.2009.08.004.
- 817 D’Cruz, J. A., Wu, C., Zahid, T., El-Hayek, Y., Zhang, L., and Eubanks, J. H. (2010). Alterations of  
818 cortical and hippocampal EEG activity in MeCP2-deficient mice. *Neurobiol Dis* 38, 8–16. doi:  
819 10.1016/j.nbd.2009.12.018.
- 820 Dhar, M., Wayman, G. A., Zhu, M., Lambert, T. J., Davare, M. A., and Appleyard, S. M. (2014). Leptin-  
821 induced spine formation requires TrpC channels and the CaM kinase cascade in the hippocampus. *J.*  
822 *Neurosci.* 34, 10022–10033. doi: 10.1523/JNEUROSCI.2868-13.2014.
- 823 Dumon, C., Diabira, D., Chudotvorova, I., Bader, F., Sahin, S., Zhang, J., et al. (2018). The adipocyte  
824 hormone leptin sets the emergence of hippocampal inhibition in mice. *Elife* 7, e36726. doi:  
825 10.7554/eLife.36726.
- 826 Ehinger, Y., Matagne, V., Villard, L., and Roux, J.-C. (2018). Rett syndrome from bench to bedside:  
827 recent advances. *F1000Res* 7, 398. doi: 10.12688/f1000research.14056.1.
- 828 Elinav, E., Niv-Spector, L., Katz, M., Price, T. O., Ali, M., Yacobovitz, M., et al. (2009). Pegylated leptin  
829 antagonist is a potent orexigenic agent: preparation and mechanism of activity. *Endocrinology* 150, 3083–  
830 3091. doi: 10.1210/en.2008-1706.
- 831 Farr, O. M., Tsoukas, M. A., and Mantzoros, C. S. (2015). Leptin and the brain: influences on brain  
832 development, cognitive functioning and psychiatric disorders. *Metabolism* 64, 114–130. doi:  
833 10.1016/j.metabol.2014.07.004.

- 834 Fisch, S., Bachner-Hinenzon, N., Ertracht, O., Guo, L., Arad, Y., Ben-Zvi, D., et al. (2020). Localized  
835 Antileptin Therapy Prevents Aortic Root Dilatation and Preserves Left Ventricular Systolic Function in a  
836 Murine Model of Marfan Syndrome. *J Am Heart Assoc* 9, e014761. doi: 10.1161/JAHA.119.014761.
- 837 Fukuhara, S., Nakajima, H., Sugimoto, S., Kodo, K., Shigehara, K., Morimoto, H., et al. (2019). High-fat  
838 diet accelerates extreme obesity with hyperphagia in female heterozygous *Mecp2*-null mice. *PLoS One* 14,  
839 e0210184. doi: 10.1371/journal.pone.0210184.
- 840 Gauda, E. B., Conde, S., Bassi, M., Zoccal, D. B., Almeida Colombari, D. S., Colombari, E., et al. (2020).  
841 Leptin: Master Regulator of Biological Functions that Affects Breathing. *Compr Physiol* 10, 1047–1083.  
842 doi: 10.1002/cphy.c190031.
- 843 Gertler, A., and Elinav, E. (2014). Novel superactive leptin antagonists and their potential therapeutic  
844 applications. *Curr Pharm Des* 20, 659–665. doi: 10.2174/13816128113199990014.
- 845 Glaze, D. G. (2002). Neurophysiology of Rett syndrome. *Mental Retardation and Developmental*  
846 *Disabilities Research Reviews* 8, 66–71. doi: 10.1002/mrdd.10024.
- 847 Gonzalez, A., Cheung, W. W., Perens, E. A., Oliveira, E. A., Gertler, A., and Mak, R. H. (2021). A Leptin  
848 Receptor Antagonist Attenuates Adipose Tissue Browning and Muscle Wasting in Infantile Nephropathic  
849 Cystinosis-Associated Cachexia. *Cells* 10, 1954. doi: 10.3390/cells10081954.
- 850 Greco, S. J., Bryan, K. J., Sarkar, S., Zhu, X., Smith, M. A., Ashford, J. W., et al. (2010). Leptin reduces  
851 pathology and improves memory in a transgenic mouse model of Alzheimer's disease. *J Alzheimers Dis*  
852 19, 1155–1167. doi: 10.3233/JAD-2010-1308.
- 853 Grillo, C. A., Piroli, G. G., Evans, A. N., Macht, V. A., Wilson, S. P., Scott, K. A., et al. (2011).  
854 Obesity/hyperleptinemic phenotype adversely affects hippocampal plasticity: effects of dietary restriction.  
855 *Physiol Behav* 104, 235–241. doi: 10.1016/j.physbeh.2010.10.020.
- 856 Guimond, D., Diabira, D., Porcher, C., Bader, F., Ferrand, N., Zhu, M., et al. (2014). Leptin potentiates  
857 GABAergic synaptic transmission in the developing rodent hippocampus. *Frontiers in Cellular*  
858 *Neuroscience* 8, 235. doi: 10.3389/fncel.2014.00235.
- 859 Guo, M., Huang, T.-Y., Garza, J. C., Chua, S. C., and Lu, X.-Y. (2013). Selective deletion of leptin  
860 receptors in adult hippocampus induces depression-related behaviours. *Int. J. Neuropsychopharmacol.* 16,  
861 857–867. doi: 10.1017/S1461145712000703.
- 862 Guo, M., Lu, Y., Garza, J. C., Li, Y., Chua, S. C., Zhang, W., et al. (2012). Forebrain glutamatergic  
863 neurons mediate leptin action on depression-like behaviors and synaptic depression. *Transl Psychiatry* 2,  
864 e83. doi: 10.1038/tp.2012.9.
- 865 Guy, J., Gan, J., Selfridge, J., Cobb, S., and Bird, A. (2007). Reversal of neurological defects in a mouse  
866 model of Rett syndrome. *Science* 315, 1143–1147. doi: 10.1126/science.1138389.
- 867 Guy, J., Hendrich, B., Holmes, M., Martin, J. E., and Bird, A. (2001). A mouse *Mecp2*-null mutation  
868 causes neurological symptoms that mimic Rett syndrome. *Nat Genet* 27, 322–326. doi: 10.1038/85899.
- 869 Harvey, J. (2003). Leptin: a multifaceted hormone in the central nervous system. *Mol Neurobiol* 28, 245–  
870 258. doi: 10.1385/MN:28:3:245.

- 871 Harvey, J. (2022). Food for Thought: Leptin and Hippocampal Synaptic Function. *Front Pharmacol* 13,  
872 882158. doi: 10.3389/fphar.2022.882158.
- 873 Harvey, J., Solovyova, N., and Irving, A. (2006). Leptin and its role in hippocampal synaptic plasticity.  
874 *Prog Lipid Res* 45, 369–378. doi: 10.1016/j.plipres.2006.03.001.
- 875 Inyushkin, A. N., Inyushkina, E. M., and Merkulova, N. A. (2009). Respiratory responses to  
876 microinjections of leptin into the solitary tract nucleus. *Neurosci Behav Physiol* 39, 231–240. doi:  
877 10.1007/s11055-009-9124-8.
- 878 Katz, D. M., Dutschmann, M., Ramirez, J.-M., and Hilaire, G. (2009). Breathing disorders in Rett  
879 syndrome: progressive neurochemical dysfunction in the respiratory network after birth. *Respir Physiol*  
880 *Neurobiol* 168, 101–108. doi: 10.1016/j.resp.2009.04.017.
- 881 Kerr, B., Silva, P. A., Walz, K., and Young, J. I. (2010). Unconventional Transcriptional Response to  
882 Environmental Enrichment in a Mouse Model of Rett Syndrome. *PLOS ONE* 5, e11534. doi:  
883 10.1371/journal.pone.0011534.
- 884 Lewis, J. D., Meehan, R. R., Henzel, W. J., Maurer-Fogy, I., Jeppesen, P., Klein, F., et al. (1992).  
885 Purification, sequence, and cellular localization of a novel chromosomal protein that binds to methylated  
886 DNA. *Cell* 69, 905–914. doi: 10.1016/0092-8674(92)90610-o.
- 887 Li, L.-L., Jin, M.-F., and Ni, H. (2018). Zinc/CaMK II Associated-Mitophagy Signaling Contributed to  
888 Hippocampal Mossy Fiber Sprouting and Cognitive Deficits Following Neonatal Seizures and Its  
889 Regulation by Chronic Leptin Treatment. *Front Neurol* 9, 802. doi: 10.3389/fneur.2018.00802.
- 890 Li, W. (2022). Excitation and Inhibition Imbalance in Rett Syndrome. *Front Neurosci* 16, 825063. doi:  
891 10.3389/fnins.2022.825063.
- 892 Lim, G., Wang, S., Zhang, Y., Tian, Y., and Mao, J. (2009). Spinal leptin contributes to the pathogenesis  
893 of neuropathic pain in rodents. *J Clin Invest* 119, 295–304. doi: 10.1172/JCI36785.
- 894 Liu, C., Wang, J., Wei, Y., Zhang, W., Geng, M., Yuan, Y., et al. (2019). Fat-Specific Knockout of Mecp2  
895 Upregulates Slpi to Reduce Obesity by Enhancing Browning. *Diabetes* 69, 35–47. doi: 10.2337/db19-  
896 0502.
- 897 Lozovaya, N., Nardou, R., Tyzio, R., Chiesa, M., Pons-Bennaceur, A., Eftekhari, S., et al. (2019). Early  
898 alterations in a mouse model of Rett syndrome: the GABA developmental shift is abolished at birth. *Sci*  
899 *Rep* 9, 9276. doi: 10.1038/s41598-019-45635-9.
- 900 McGregor, G., and Harvey, J. (2019). Leptin Regulation of Synaptic Function at Hippocampal TA-CA1  
901 and SC-CA1 Synapses: Implications for Health and Disease. *Neurochem Res* 44, 650–660. doi:  
902 10.1007/s11064-017-2362-1.
- 903 Medrihan, L., Tantalaki, E., Aramuni, G., Sargsyan, V., Dudanova, I., Missler, M., et al. (2008). Early  
904 defects of GABAergic synapses in the brain stem of a MeCP2 mouse model of Rett syndrome. *J*  
905 *Neurophysiol* 99, 112–121. doi: 10.1152/jn.00826.2007.
- 906 Mora-Muñoz, L., Guerrero-Naranjo, A., Rodríguez-Jimenez, E. A., Mastronardi, C. A., and Velez-van-  
907 Meerbeke, A. (2018). Leptin: role over central nervous system in epilepsy. *BMC Neurosci* 19, 51. doi:  
908 10.1186/s12868-018-0453-9.

- 909 Moretti, P., Levenson, J. M., Battaglia, F., Atkinson, R., Teague, R., Antalffy, B., et al. (2006). Learning  
910 and memory and synaptic plasticity are impaired in a mouse model of Rett syndrome. *J Neurosci* 26, 319–  
911 327. doi: 10.1523/JNEUROSCI.2623-05.2006.
- 912 Motil, K. J., Barrish, J. O., Lane, J., Geerts, S. P., Annese, F., McNair, L., et al. (2011). Vitamin D  
913 deficiency is prevalent in girls and women with Rett syndrome. *J Pediatr Gastroenterol Nutr* 53, 569–  
914 574. doi: 10.1097/MPG.0b013e3182267a66.
- 915 Moulton, P. R., and Harvey, J. (2008). Hormonal regulation of hippocampal dendritic morphology and  
916 synaptic plasticity. *Cell Adh Migr* 2, 269–275. doi: 10.4161/cam.2.4.6354.
- 917 Moulton, P. R., and Harvey, J. (2009). Regulation of glutamate receptor trafficking by leptin. *Biochem Soc*  
918 *Trans* 37, 1364–1368. doi: 10.1042/BST0371364.
- 919 Neyens, D., Zhao, H., Huston, N. J., Wayman, G. A., Ritter, R. C., and Appleyard, S. M. (2020). Leptin  
920 Sensitizes NTS Neurons to Vagal Input by Increasing Postsynaptic NMDA Receptor Currents. *J Neurosci*  
921 40, 7054–7064. doi: 10.1523/JNEUROSCI.1865-19.2020.
- 922 O'Malley, D., MacDonald, N., Mizielinska, S., Connolly, C. N., Irving, A. J., and Harvey, J. (2007).  
923 Leptin promotes rapid dynamic changes in hippocampal dendritic morphology. *Mol Cell Neurosci* 35,  
924 559–572. doi: 10.1016/j.mcn.2007.05.001.
- 925 Oomura, Y., Hori, N., Shiraishi, T., Fukunaga, K., Takeda, H., Tsuji, M., et al. (2006). Leptin facilitates  
926 learning and memory performance and enhances hippocampal CA1 long-term potentiation and CaMK II  
927 phosphorylation in rats. *Peptides* 27, 2738–2749. doi: 10.1016/j.peptides.2006.07.001.
- 928 Park, M. J., Aja, S., Li, Q., Degano, A. L., Penati, J., Zhuo, J., et al. (2014). Anaplerotic triheptanoin diet  
929 enhances mitochondrial substrate use to remodel the metabolome and improve lifespan, motor function,  
930 and sociability in MeCP2-null mice. *PLoS One* 9, e109527. doi: 10.1371/journal.pone.0109527.
- 931 Pinto, S., Roseberry, A. G., Liu, H., Diano, S., Shanabrough, M., Cai, X., et al. (2004). Rapid rewiring of  
932 arcuate nucleus feeding circuits by leptin. *Science* 304, 110–115. doi: 10.1126/science.1089459.
- 933 Raghavan, R., Zuckerman, B., Hong, X., Wang, G., Ji, Y., Paige, D., et al. (2018). Fetal and Infancy  
934 Growth Pattern, Cord and Early Childhood Plasma Leptin, and Development of Autism Spectrum  
935 Disorder in the Boston Birth Cohort. *Autism Res* 11, 1416–1431. doi: 10.1002/aur.2011.
- 936 Ramirez, J.-M., Ward, C. S., and Neul, J. L. (2013). Breathing challenges in Rett syndrome: lessons  
937 learned from humans and animal models. *Respir Physiol Neurobiol* 189, 280–287. doi:  
938 10.1016/j.resp.2013.06.022.
- 939 Ricceri, L., De Filippis, B., and Laviola, G. (2008). Mouse models of Rett syndrome: from behavioural  
940 phenotyping to preclinical evaluation of new therapeutic approaches. *Behav Pharmacol* 19, 501–517. doi:  
941 10.1097/FBP.0b013e32830c3645.
- 942 Sahin, G. S., Dhar, M., Dillon, C., Zhu, M., Shiina, H., Winters, B. D., et al. (2020). Leptin stimulates  
943 synaptogenesis in hippocampal neurons via KLF4 and SOCS3 inhibition of STAT3 signaling. *Mol Cell*  
944 *Neurosci* 106, 103500. doi: 10.1016/j.mcn.2020.103500.
- 945 Sahin, G. S., Luis Rodriguez-Llamas, J., Dillon, C., Medina, I., Appleyard, S. M., Gaiarsa, J.-L., et al.  
946 (2021). Leptin increases GABAergic synaptogenesis through the Rho guanine exchange factor  $\beta$ -PIX in  
947 developing hippocampal neurons. *Sci Signal* 14, eabe4111. doi: 10.1126/scisignal.abe4111.

- 948 Sandweiss, A. J., Brandt, V. L., and Zoghbi, H. Y. (2020). Advances in understanding of Rett syndrome  
949 and MECP2 duplication syndrome: prospects for future therapies. *Lancet Neurol* 19, 689–698. doi:  
950 10.1016/S1474-4422(20)30217-9.
- 951 Scaramuzza, L., De Rocco, G., Desiato, G., Cobolli Gigli, C., Chiacchiaretta, M., Mirabella, F., et al.  
952 (2021). The enhancement of activity rescues the establishment of *Mecp2* null neuronal phenotypes. *EMBO*  
953 *Mol Med*, e12433. doi: 10.15252/emmm.202012433.
- 954 Sciorati, C., Clementi, E., Manfredi, A. A., and Rovere-Querini, P. (2015). Fat deposition and  
955 accumulation in the damaged and inflamed skeletal muscle: cellular and molecular players. *Cell Mol Life*  
956 *Sci* 72, 2135–2156. doi: 10.1007/s00018-015-1857-7.
- 957 Shanley, L. J., Irving, A. J., Rae, M. G., Ashford, M. L. J., and Harvey, J. (2002). Leptin inhibits rat  
958 hippocampal neurons via activation of large conductance calcium-activated K<sup>+</sup> channels. *Nat Neurosci* 5,  
959 299–300. doi: 10.1038/mn824.
- 960 Signore, A. P., Zhang, F., Weng, Z., Gao, Y., and Chen, J. (2008). Leptin neuroprotection in the CNS:  
961 mechanisms and therapeutic potentials. *J. Neurochem.* 106, 1977–1990. doi: 10.1111/j.1471-  
962 4159.2008.05457.x.
- 963 Singh, U. P., Singh, N. P., Guan, H., Busbee, B., Price, R. L., Taub, D. D., et al. (2013). Leptin antagonist  
964 ameliorates chronic colitis in IL-10<sup>-/-</sup> mice. *Immunobiology* 218, 1439–1451. doi:  
965 10.1016/j.imbio.2013.04.020.
- 966 Solovyova, N., Moulton, P. R., Milojkovic, B., Lambert, J. J., and Harvey, J. (2009). Bi-directional  
967 modulation of fast inhibitory synaptic transmission by leptin. *J. Neurochem.* 108, 190–201. doi:  
968 10.1111/j.1471-4159.2008.05751.x.
- 969 Stagi, S., Cavalli, L., Congiu, L., Scusa, M. F., Ferlini, A., Bigoni, S., et al. (2015). Thyroid function in  
970 Rett syndrome. *Horm Res Paediatr* 83, 118–125. doi: 10.1159/000370066.
- 971 Torres-Andrade, R., Moldenhauer, R., Gutierrez-Bertín, N., Soto-Covasich, J., Mancilla-Medina, C.,  
972 Ehrenfeld, C., et al. (2014). The increase in body weight induced by lack of methyl CpG binding protein-2  
973 is associated with altered leptin signalling in the hypothalamus. *Exp. Physiol.* 99, 1229–1240. doi:  
974 10.1113/expphysiol.2014.079798.
- 975 Valladolid-Acebes, I., Merino, B., Principato, A., Fole, A., Barbas, C., Lorenzo, M. P., et al. (2012). High-  
976 fat diets induce changes in hippocampal glutamate metabolism and neurotransmission. *Am J Physiol*  
977 *Endocrinol Metab* 302, E396-402. doi: 10.1152/ajpendo.00343.2011.
- 978 Vong, L., Ye, C., Yang, Z., Choi, B., Chua, S., and Lowell, B. B. (2011). Leptin action on GABAergic  
979 neurons prevents obesity and reduces inhibitory tone to POMC neurons. *Neuron* 71, 142–154. doi:  
980 10.1016/j.neuron.2011.05.028.
- 981 Wang, X., Lacza, Z., Sun, Y. E., and Han, W. (2014). Leptin resistance and obesity in mice with deletion  
982 of methyl-CpG-binding protein 2 (MeCP2) in hypothalamic pro-opiomelanocortin (POMC) neurons.  
983 *Diabetologia* 57, 236–245. doi: 10.1007/s00125-013-3072-0.
- 984 Williams, K. W., and Smith, B. N. (2006). Rapid inhibition of neural excitability in the nucleus tractus  
985 solitarius by leptin: implications for ingestive behaviour. *J Physiol* 573, 395–412. doi:  
986 10.1113/jphysiol.2006.106336.



987 Yu, H., Shi, L., Chen, J., Jun, S., Hao, Y., Wang, S., et al. (2022). A Neural Circuit Mechanism  
988 Controlling Breathing by Leptin in the Nucleus Tractus Solitarii. *Neurosci Bull* 38, 149–165. doi:  
989 10.1007/s12264-021-00742-4.

990 Zuure, W. A., Roberts, A. L., Quennell, J. H., and Anderson, G. M. (2013). Leptin signaling in GABA  
991 neurons, but not glutamate neurons, is required for reproductive function. *J Neurosci* 33, 17874–17883.  
992 doi: 10.1523/JNEUROSCI.2278-13.2013.

993

994

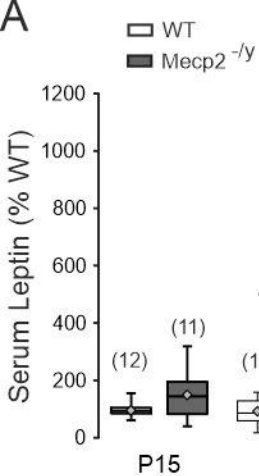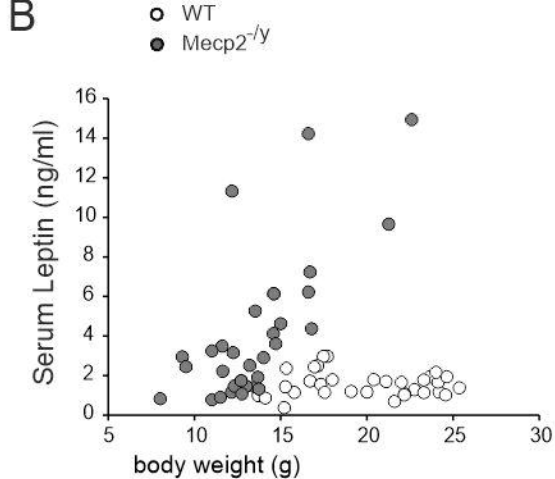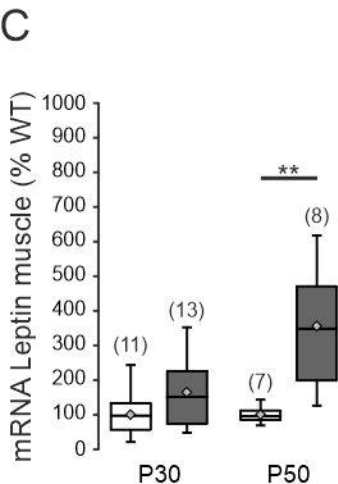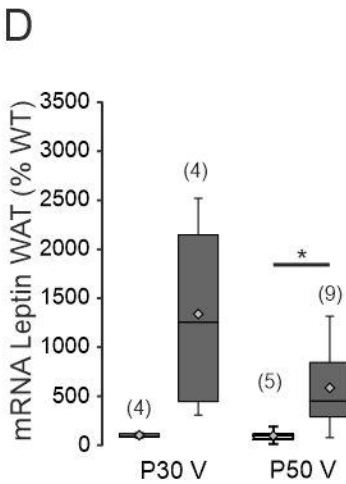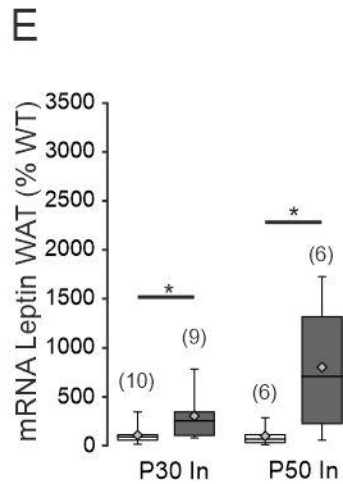

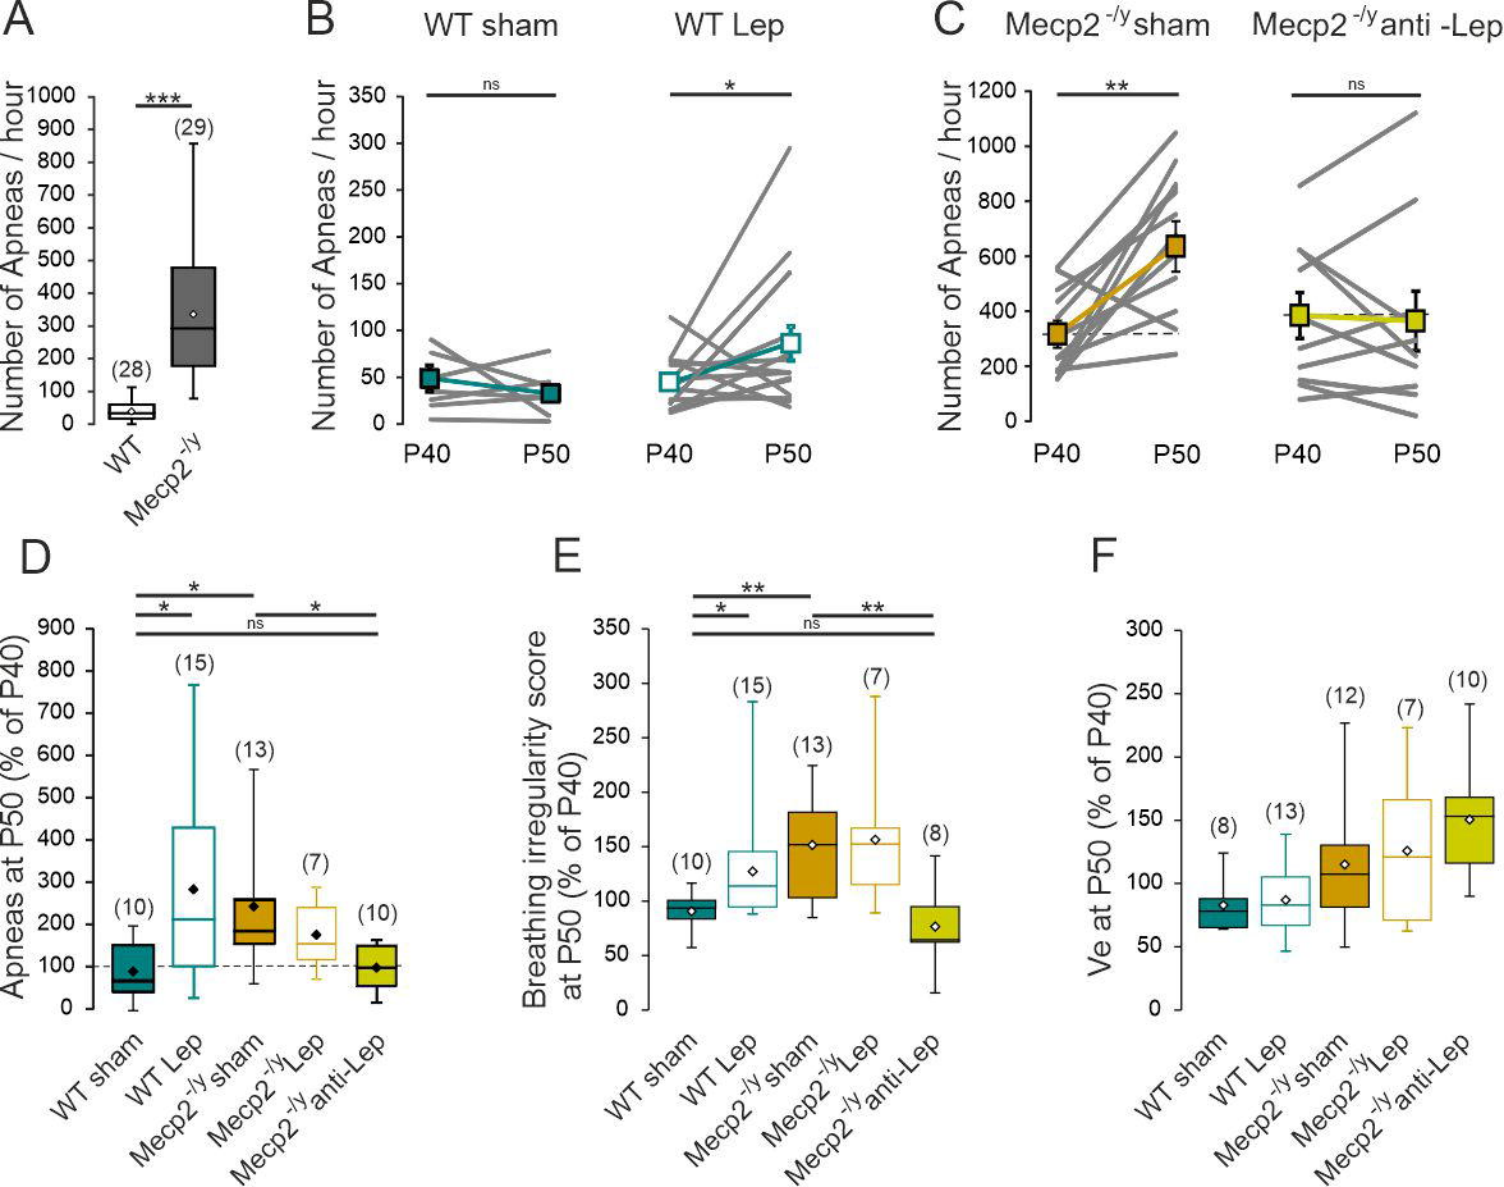

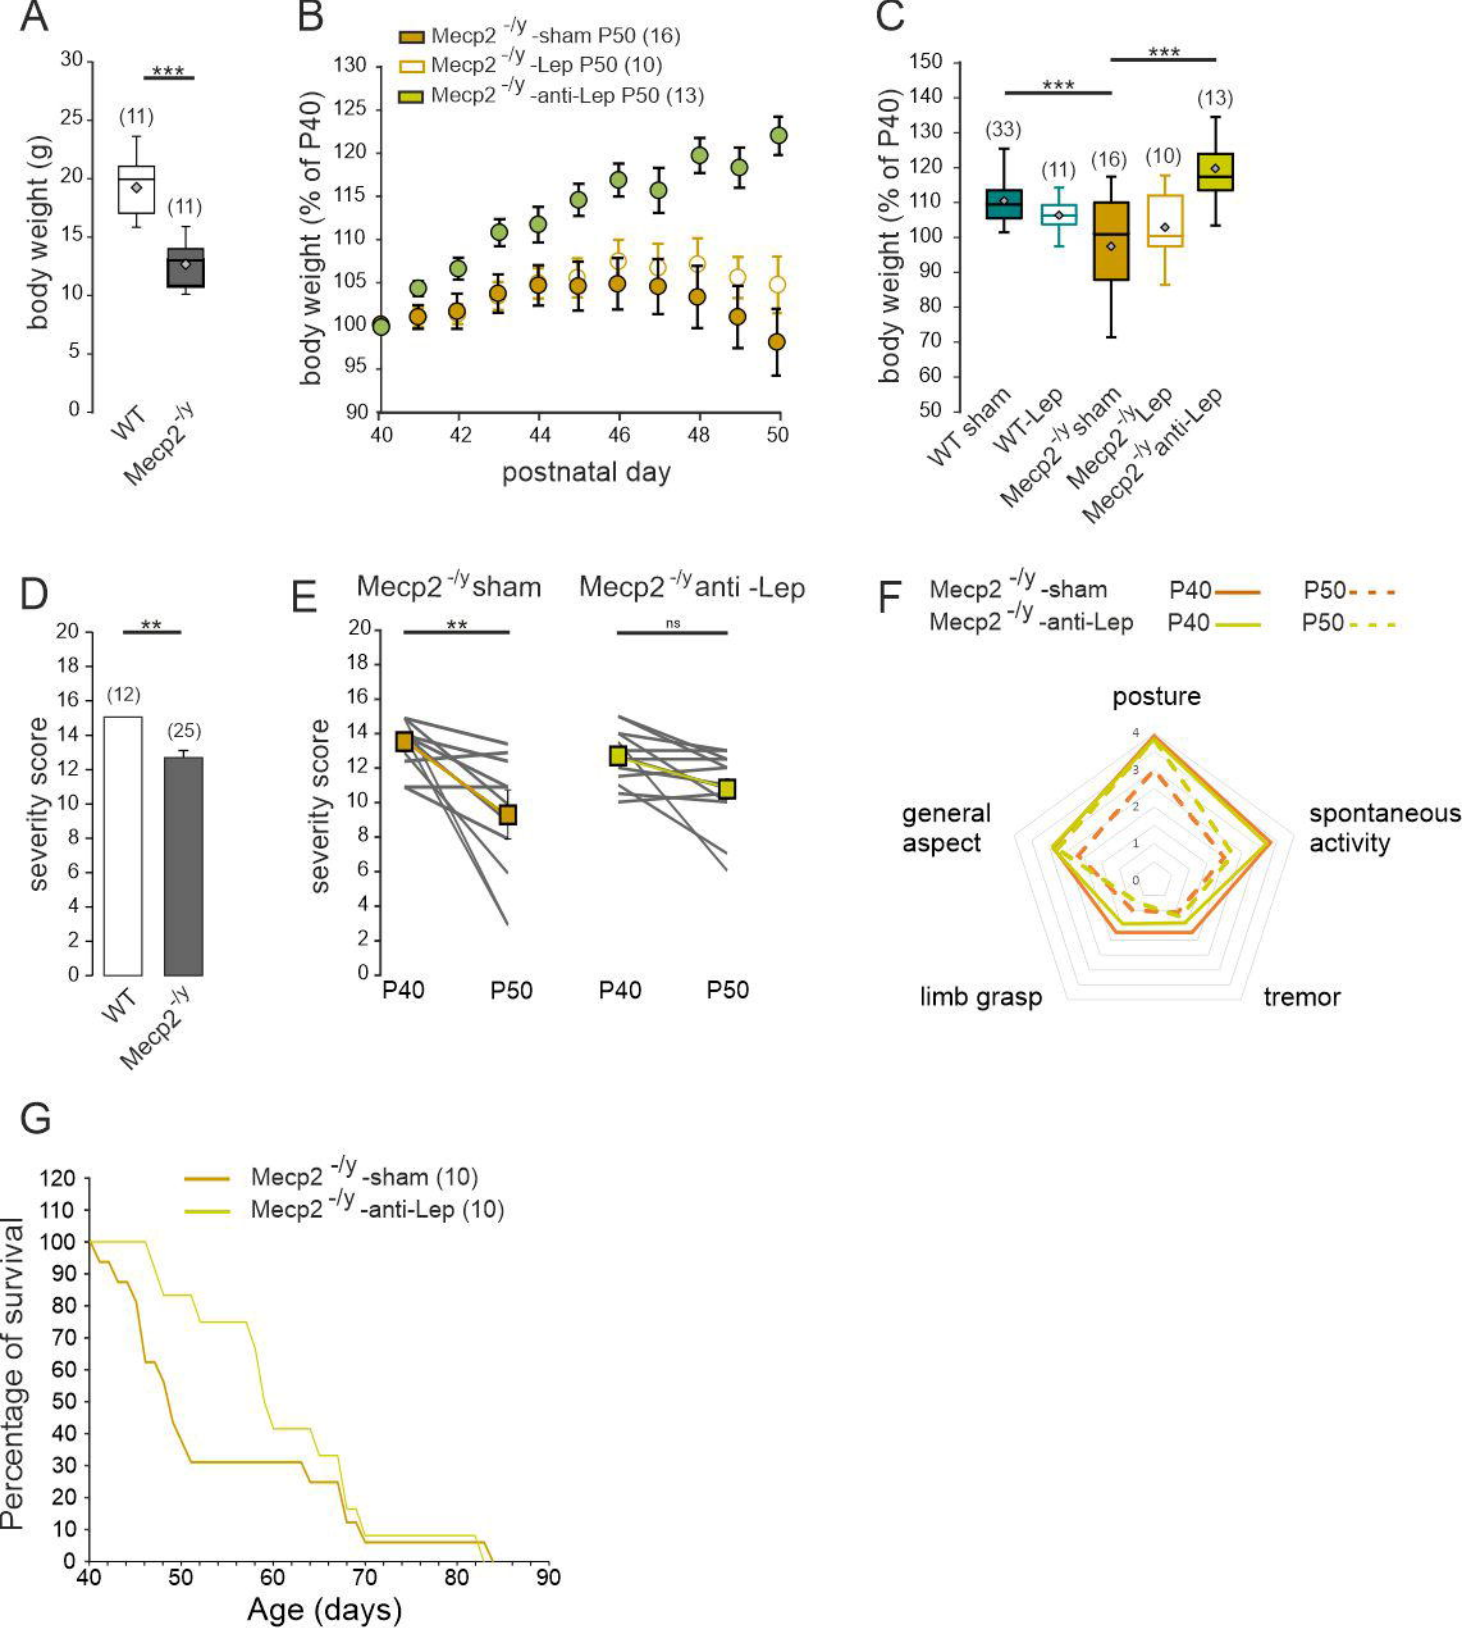

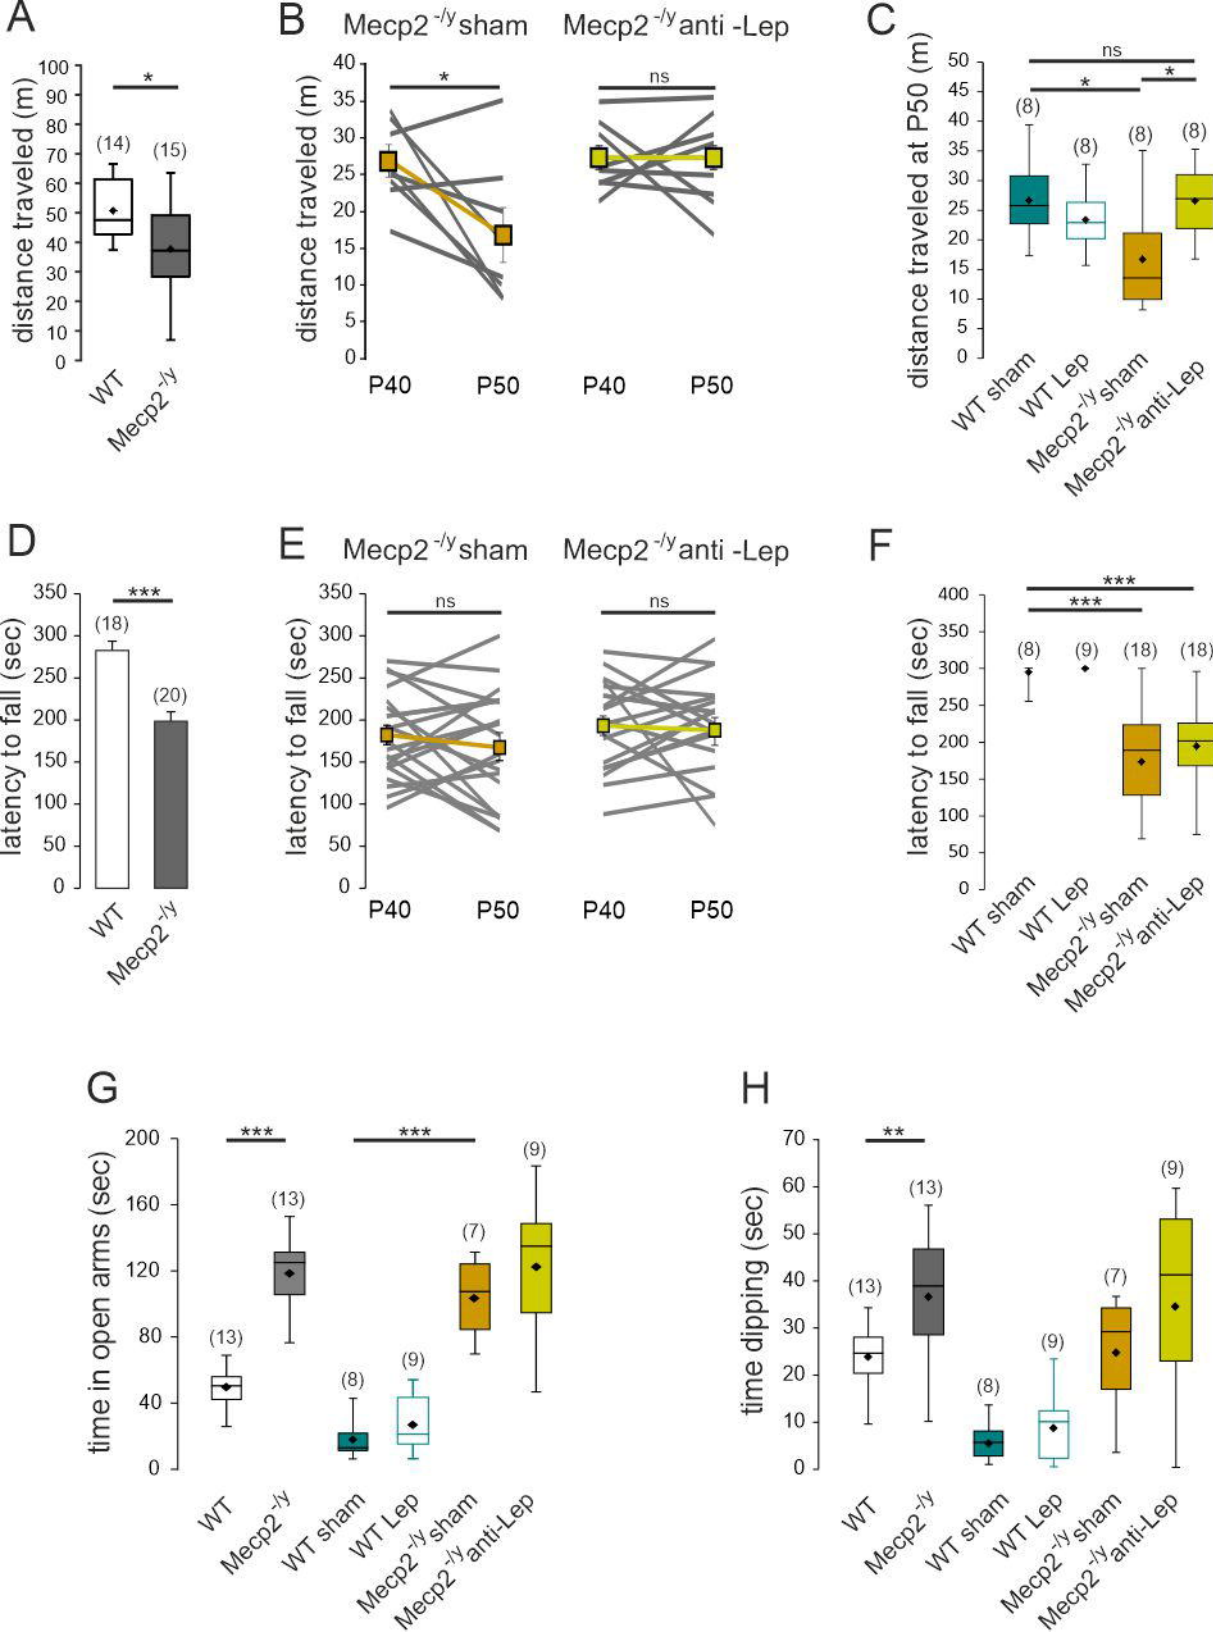

**A**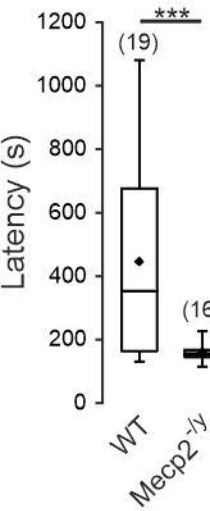**B**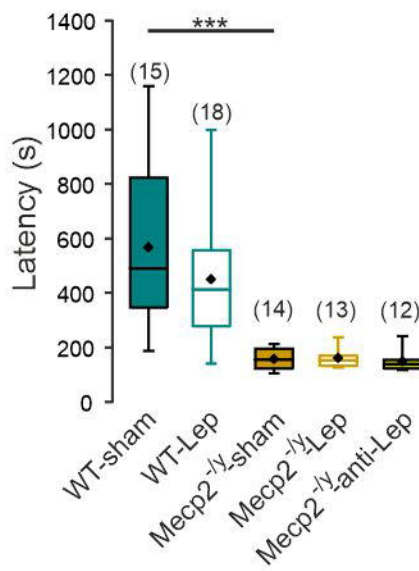**C**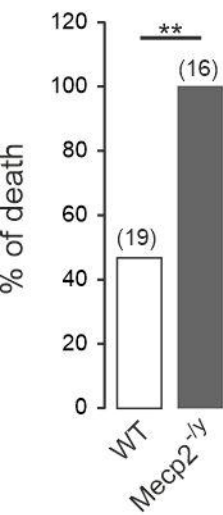**D**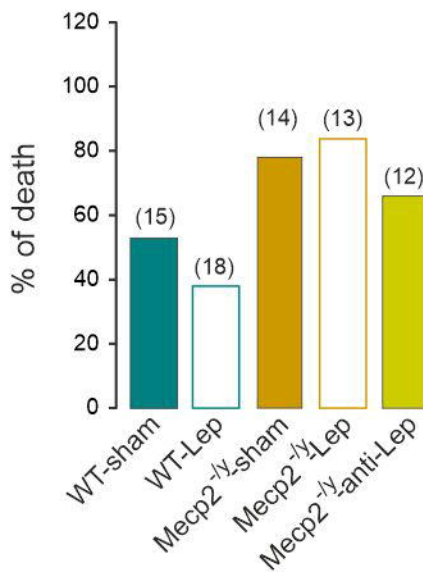

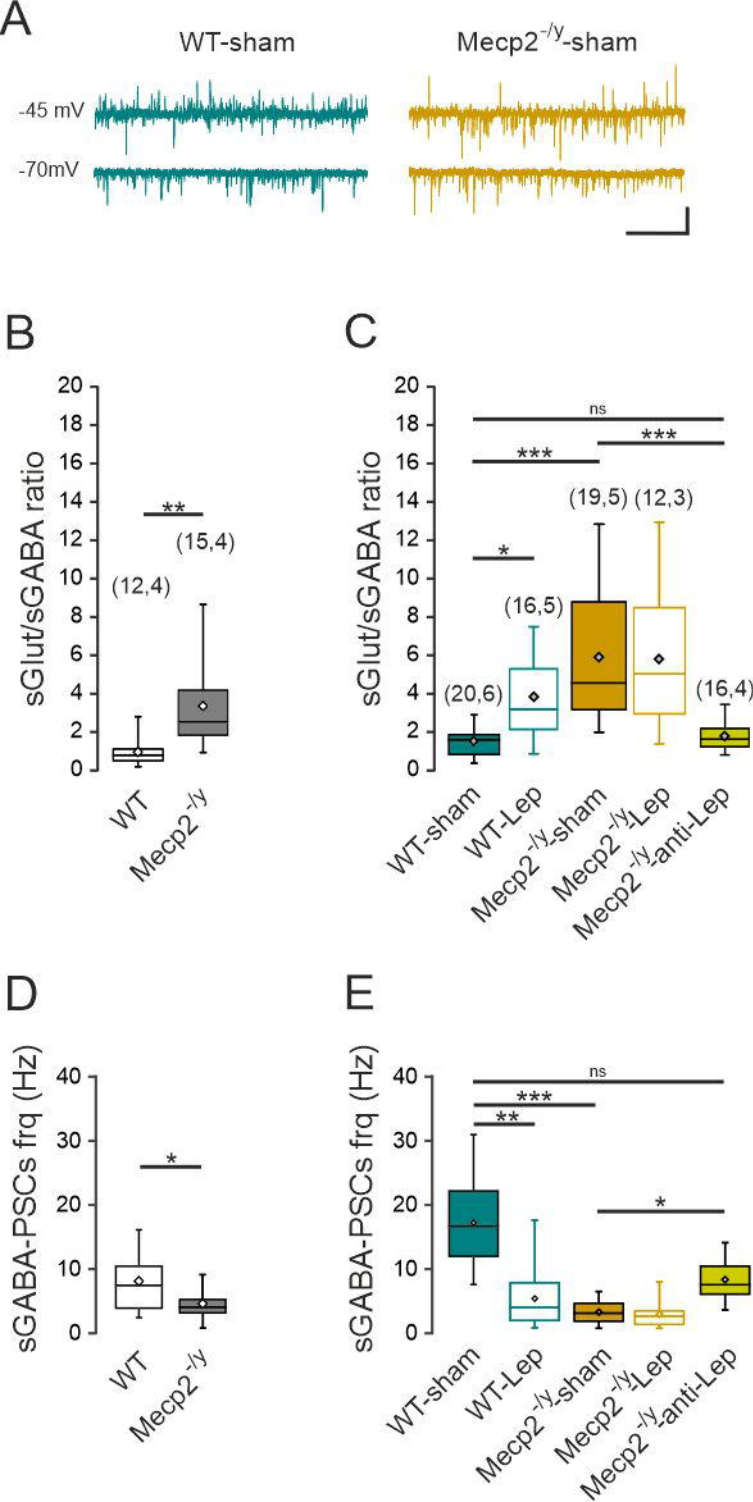

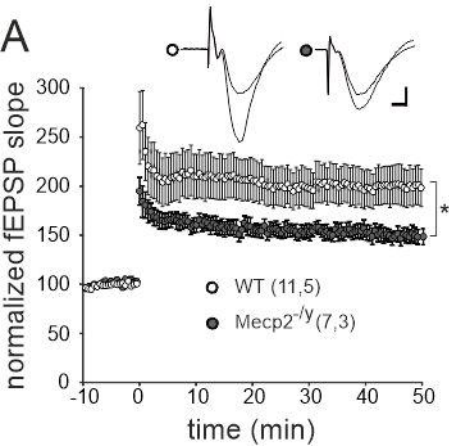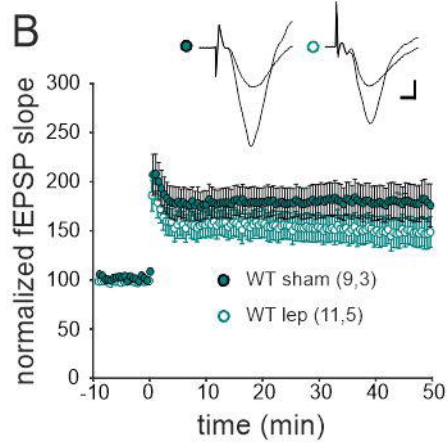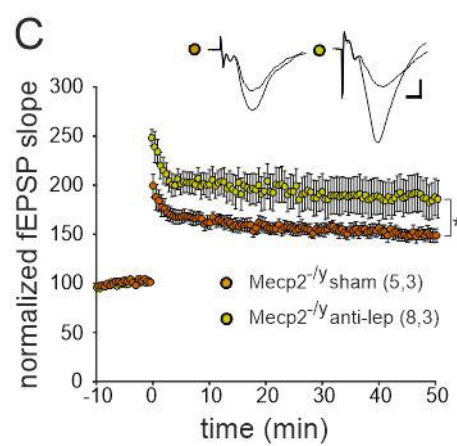



**A**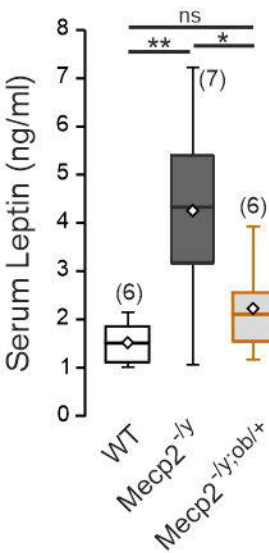**B**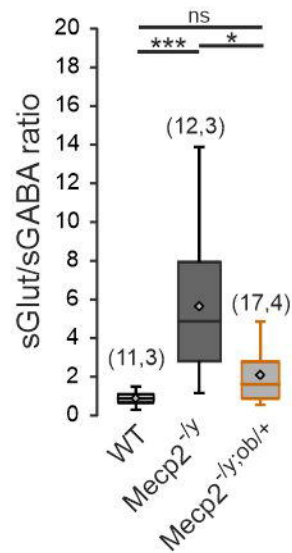**C**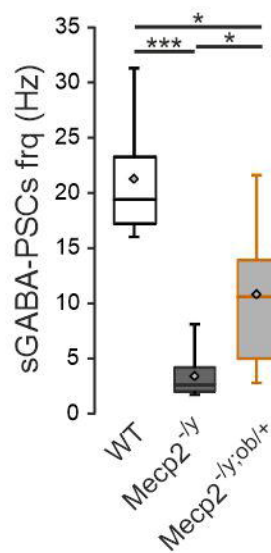**D**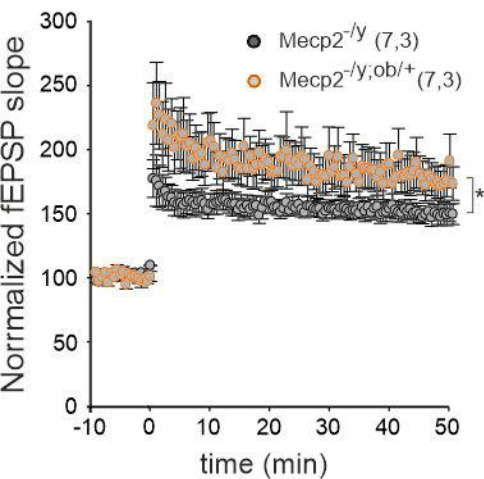**E**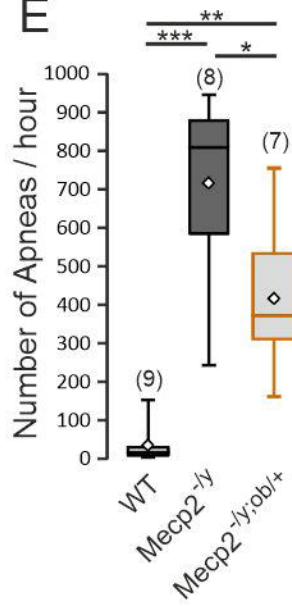**F**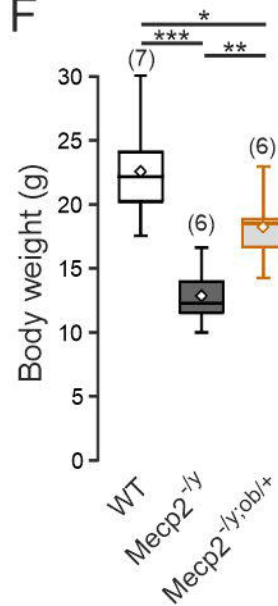

Source: https://www.biorxiv.org/content/10.1101/2023.02.03.526251.full.pdf
